# Supplementary material for: Naphthalimide functionalized metal–organic framework for rapid and nanomolar level detection of hydrazine and anti-hypertensive drug nicardipine
Source: Royal Society of Chemistry journal article supplement (doi:10.1039/d4dt00818a), 2024-01-01
Supplement: d4dt00818a1.pdf [file d4dt00818a1.pdf]

## Supporting Information For:

### **Naphthalimide Functionalized Metal-Organic Framework for Rapid and Nanomolar Level Detection of Hydrazine and Anti-hypertensive Drug Nicardipine**

*Sk Sakir Hossain,<sup>a</sup> Dirk Volkmer,<sup>b</sup> and Shyam Biswas<sup>a\*</sup>*

<sup>a</sup> Department of Chemistry, Indian Institute of Technology Guwahati, 781039, Assam, India.

<sup>b</sup> University of Augsburg, Institute of Physics, Chair of Solid State and Materials Chemistry, Universitaetsstrasse 1, 86159 Augsburg, Germany.

\*Corresponding author. Tel: 91-3612583309

E-mail address: sbiswas@iitg.ac.in

### **Materials and Characterization Methods:**

All of the chemicals were purchased from commercial suppliers and used directly. The 2-(6-bromo-1,3-dioxo-1H-benzo[de]isoquinolin-2(3H)-yl) terephthalic acid linker (H<sub>2</sub>L) was prepared according to the below mentioned procedure. The Attenuated Total Reflectance Infrared (ATR-IR) spectra were recorded using PerkinElmer UATR Two at the ambient condition in the region 400-4000 cm<sup>-1</sup>. The notations used for characterization of the bands are broad (br), strong (s), very strong (vs), medium (m), weak (w) and shoulder (sh). Fluorescence sensing studies were performed with a HORIBA JOBIN YVON Fluoromax-4 spectrofluorometer. A Bruker Avance III 600 NMR spectrometer was used for recording <sup>1</sup>H and <sup>13</sup>C NMR spectra at 500 MHz. Thermogravimetric analysis (TGA) was carried out with a Netzsch STA-409CD thermal analyzer in the temperature range of 30-700 °C in an O<sub>2</sub> atmosphere at the heating rate of 4 °C min<sup>-1</sup>. PXRD data were collected by using Rigaku Smartlab X-ray diffractometer with Cu-K $\alpha$  radiation, 40 kV of operating voltage and 125 mA of operating current. N<sub>2</sub> sorption isotherms were recorded by using Quantachrome Quadrasorb evo volumetric gas adsorption equipment at -196 °C. Before the sorption analysis, the degassing of the compound was carried out at 100 °C under a high vacuum for 24 h. Gemini 500 was utilized for Energy Dispersive X-rays spectrometer (EDX) for elemental characterization. FE-SEM images were captured with a Zeiss (SIGMA 300) scanning electron microscope. Pawley refinement was carried out using Materials Studio software.<sup>1</sup>

### **Preparation MOF (1') Suspension for Fluorescence Experiments:**

We chose water as a sensing medium for the fluorometric sensing of hydrazine with the synthesised MOF (1'). The MOF suspension was first prepared for sensing. 4 mg of 1' was taken in a glass vial, and 4 mL of distilled water was added. The vial was sonicated for 30 minutes. Subsequently, the prepared suspension vial was left undisturbed at room temperature overnight to ensure its stability. For the fluorescence experiment, 300  $\mu$ L of the aforementioned stable suspension was carefully transferred into a quartz container, containing 3 mL of distilled water. Fluorescence measurements were then conducted across the wavelength range of 360-610 nm, with excitation of the suspension at 340 nm for hydrazine sensing. For nifedipine sensing the fluorescence data were recorded within the range of 490-630 nm and rest were similar to previous.

### **Fluorometric Detection of Ranitidine in Human Blood Serum Sample:**

From the right arm vein of a healthy human with blood group A<sup>+</sup>, 10 mL of blood sample was collected. The sample was centrifuged at 10,000 rpm for 15 min to obtain blood plasma, from which the light-yellow blood serum was collected and stored in a Falcon tube at -20 °C. To conduct fluorescence detection experiments, varying concentrations of ranitidine were added to different aliquots of the human blood serum sample containing a MOF suspended in HEPES buffer (pH = 7.4).

### **Fluorometric Detection of Ranitidine in Human Urine Sample:**

A 10 mL urine sample was collected from a healthy individual and treated with 500 mL of HNO<sub>3</sub> to eliminate any interfering living organisms. The sample was then centrifuged at 8000 rpm for 10 min, and the supernatant was used for the experiments. To conduct fluorescence

experiments, various amounts of ranitidine were added to the urine samples containing a HEPES buffer suspension of the probe.

**Synthetic Procedure for 2-(6-Bromo-1, 3-Dioxo-1H-Benzo[de]Isoquinolin-2(3H)-yl) Terephthalic Acid Linker (H<sub>2</sub>L):**

In a 50 mL round-bottom flask 181 mg (1 mmol) of 2-amino terephthalic acid is taken and dissolved in 5 mL of anhydrous MeOH. Then, 10 drops of trimethylamine (Et<sub>3</sub>N) are added to the reaction mixture at 0°C under stirring condition. A suspension of 275 mg 4-bromo-1, 8-naphthalic anhydride in 10 mL of anhydrous MeOH is added to the previous reaction mixture dropwise under stirring condition. After that, the reaction mixture is refluxed for 24 hours at N<sub>2</sub> atmosphere. After the completion of the reaction the reaction mixture is allowed to cool to room temperature and poured to 50 mL ice cold distilled water. The reaction mixture is acidified with conc. HCl and then precipitation took place. The product is collected by vacuum filtration and washed several times with distilled water. Finally, the product is dried in a hot air oven at 80 °C. The <sup>1</sup>H NMR and <sup>13</sup>C NMR data were recorded of the linker. The <sup>1</sup>H NMR and <sup>13</sup>C NMR data are shown in Figure 1a and 1b respectively.

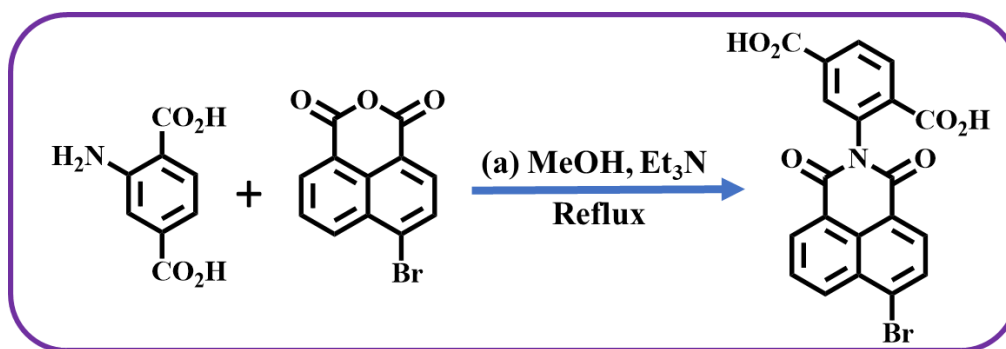

**Scheme 1.** Reaction scheme for the synthesis of H<sub>2</sub>L linker.

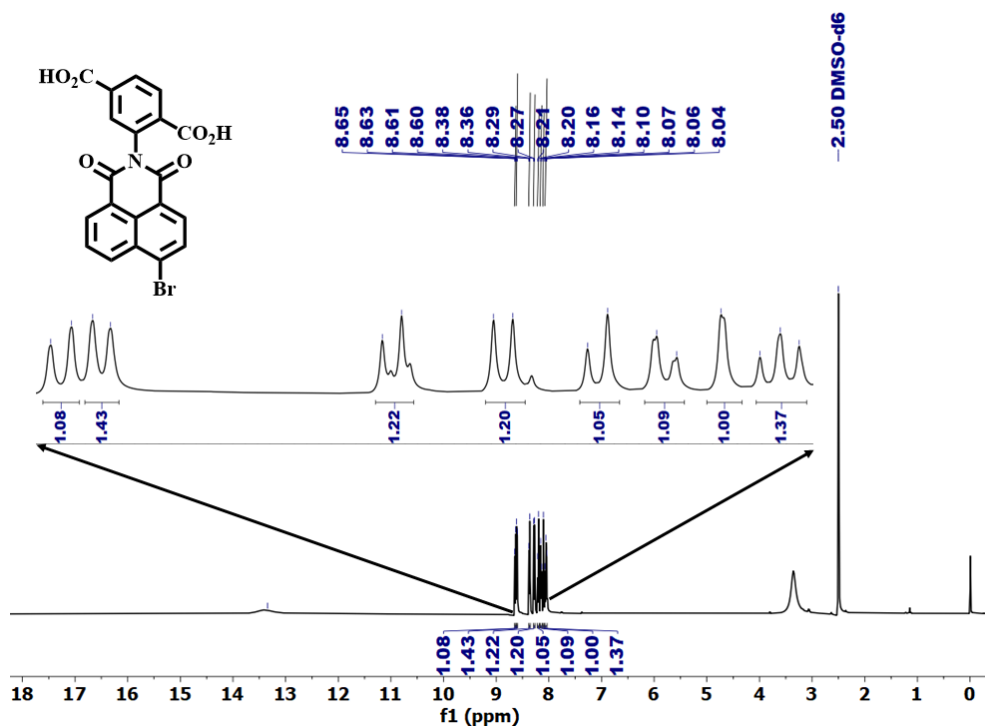

Figure S1. <sup>1</sup>H NMR spectrum (500 MHz, DMSO-d<sub>6</sub>) of H<sub>2</sub>L linker.

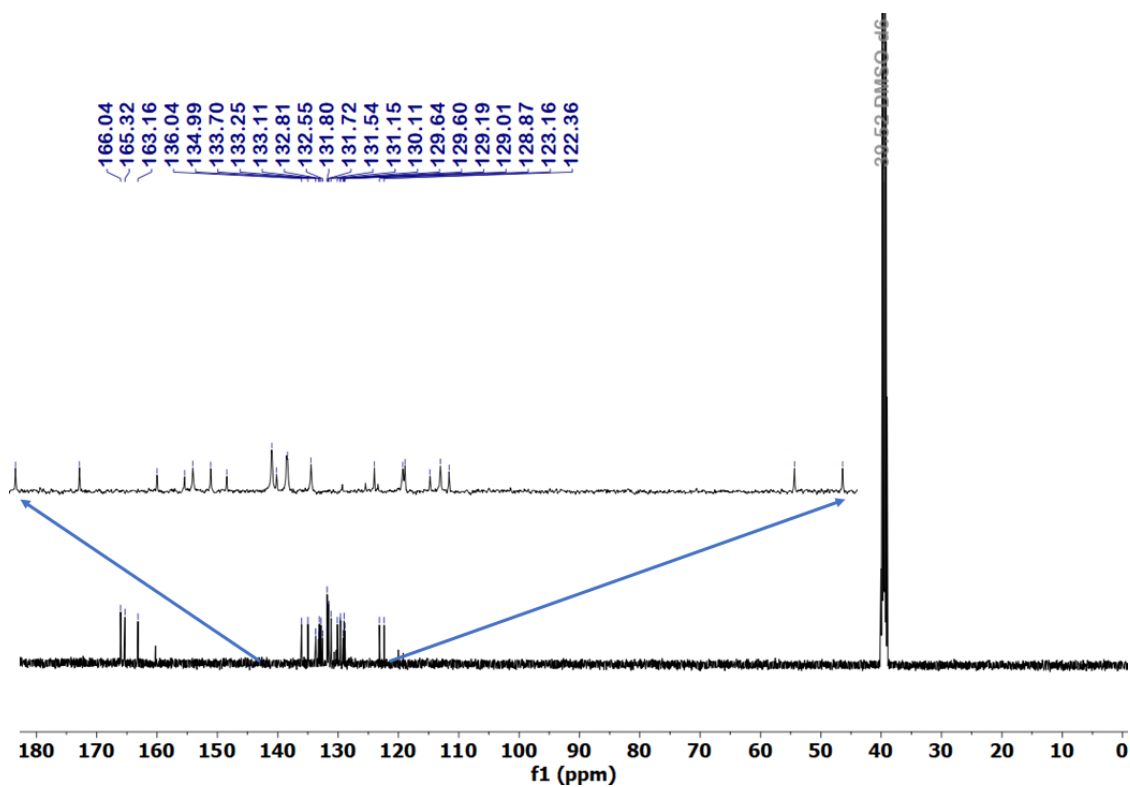

Figure S2. <sup>13</sup>C NMR spectrum (125 MHz, DMSO-d<sub>6</sub>) of H<sub>2</sub>L linker.

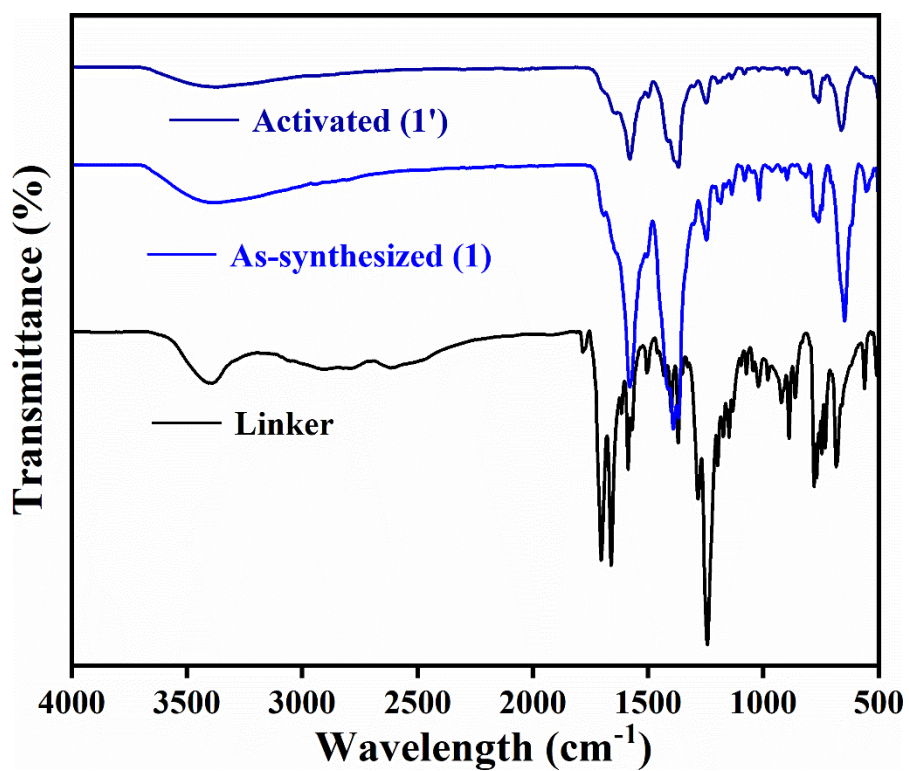

**Figure S3.** ATR-IR spectra of H<sub>2</sub>L linker, **1** and **1'**.

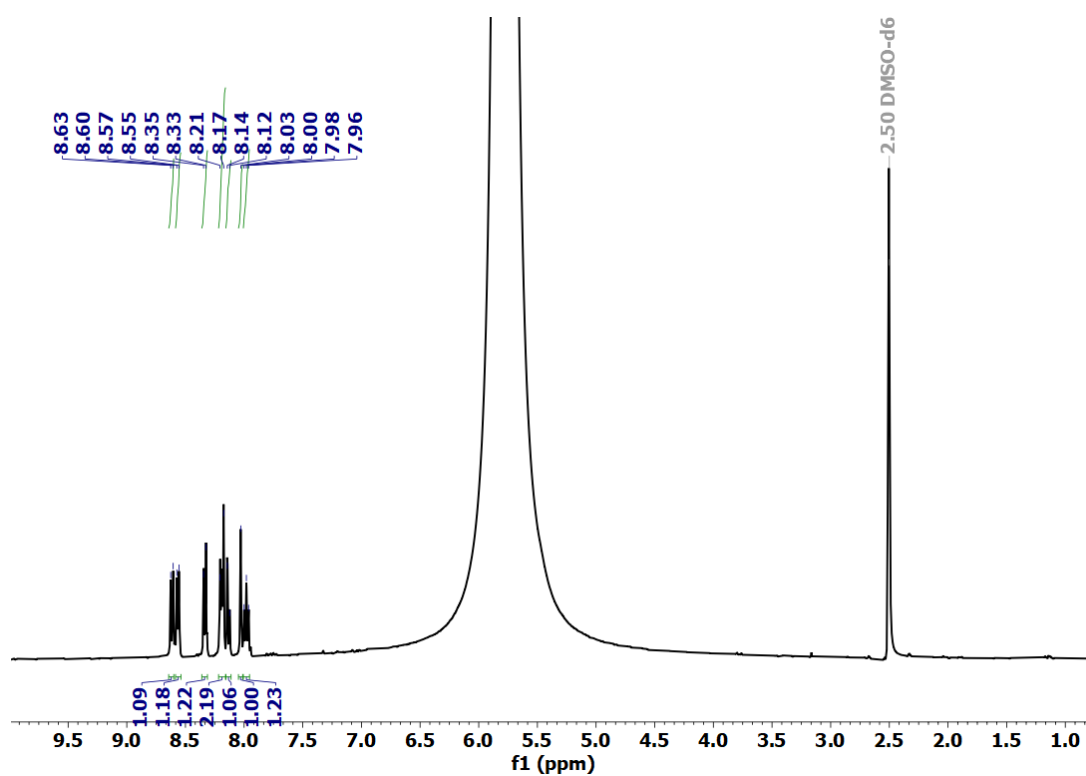

**Figure S4.** <sup>1</sup>H NMR spectrum of digested **1'** (digested using 100 μL of 40% HF in 500 μL of DMSO-d<sub>6</sub>).

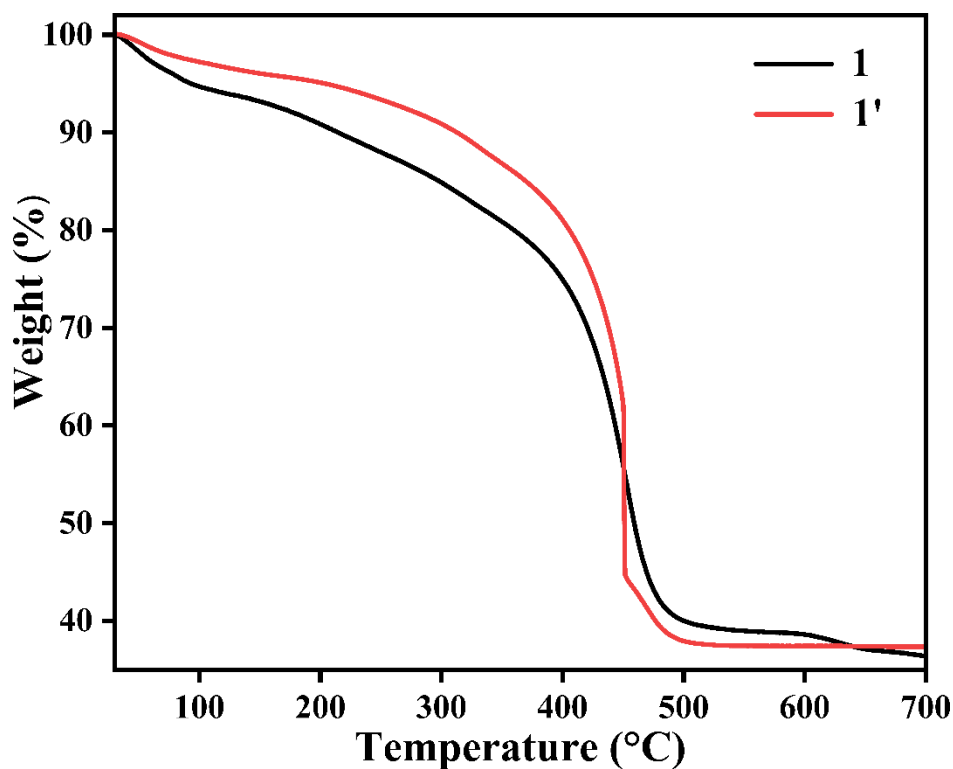

**Figure S5.** TGA curves of **1** and **1'** recorded under O<sub>2</sub> atmosphere in the temperature range of 30-700 °C with a heating rate 4 °C/min.

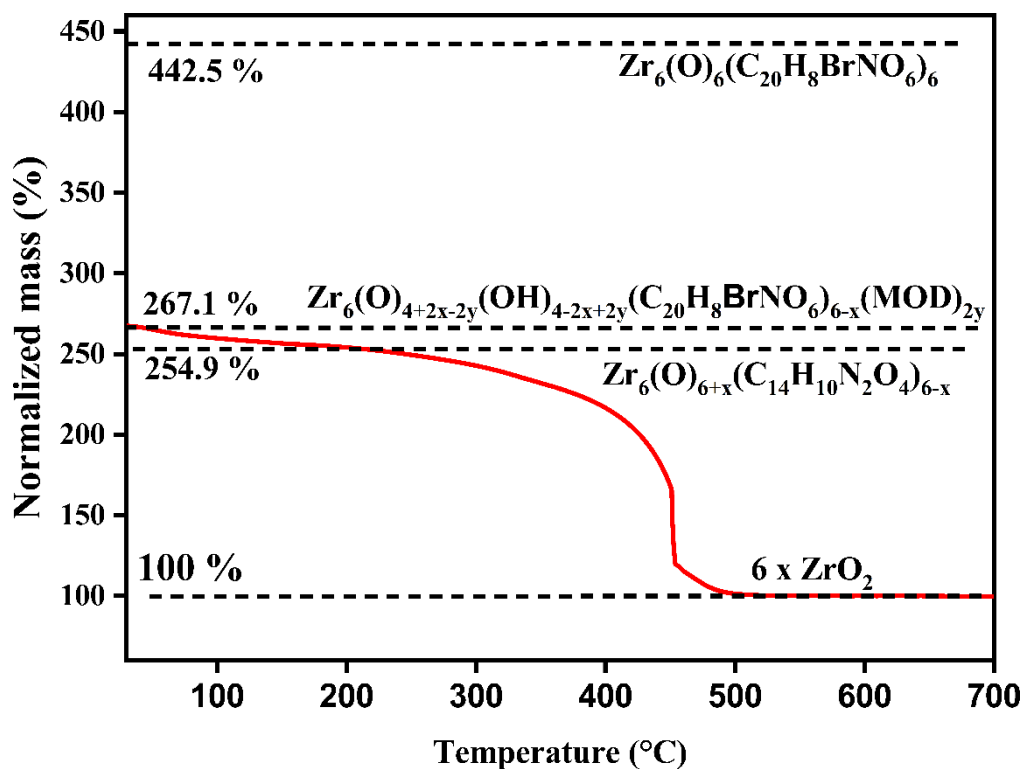

**Figure S6.** Calculation of missing ligand defects from the TG curve of activated **1'**. The vertical dashed line pinpoints  $T_{\text{Plat.}}$ , the temperature at which the plateau ( $W_{\text{Exp. Plat.}}$ ) is reached. The horizontal dashed lines pinpoint the relevant TGA plateaus.

## Calculation of Linker Defects for 1' from TGA Data:

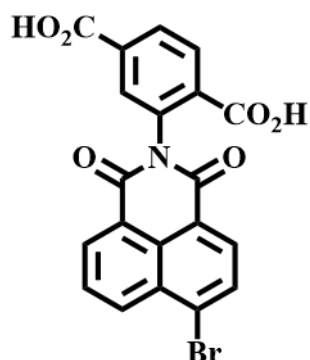

**2-(6-bromo-1,3-dioxo-1H-benzo[de]isoquinolin-2(3H)-yl)terephthalic acid**

Formula of MOF =  $[\text{Zr}_6(\text{O})_4(\text{OH})_4(\text{C}_{10}\text{H}_{20}\text{BrNO}_6)_6]$

Molecular weight = 3307.3 g/mol

- ❖ The dehydroxylated and modulator free formula of MOF is  $[\text{Zr}_6(\text{O})_6(\text{C}_{10}\text{H}_{20}\text{BrNO}_6)_6]$  (ideal),
- ❖ Molecular Weight = 3271.3 g/mol
- ❖ The dehydroxylated and modulator free formula of MOF is  $[\text{Zr}_6(\text{O})_{6+x}(\text{C}_{10}\text{H}_{20}\text{BrNO}_6)_{6-x}]$  (experimental), Molecular Weight = 3271.3 g/mol (x = number of linker defect).
- ❖ From TGA data, after final weight loss step, the remaining mass is due to 6 moles of  $\text{ZrO}_2$  i.e.  $6 \times 123.2 = 739.3$  g/mol.
- ❖ The ideal weight of  $[\text{Zr}_6(\text{O})_6(\text{C}_{10}\text{H}_{20}\text{BrNO}_6)_6]$  is 4.42 times of 6 moles of  $\text{ZrO}_2$ .
- ❖ The remaining flat mass obtained at the last mass on TGA curve was normalized to 100%.
- ❖ The ideal normalized mass percentage for  $[\text{Zr}_6(\text{O})_6(\text{C}_{10}\text{H}_{20}\text{BrNO}_6)_6]$  is 442.4 %.
- ❖ The experimental normalized mass percentage of  $[\text{Zr}_6(\text{O})_{6+x}(\text{C}_{10}\text{H}_{20}\text{BrNO}_6)_{6-x}]$  from TGA is 254.9%.
- ❖  $x = 6 - (\text{W}_{\text{wt. Plat}} - \text{W}_{\text{end}}/\text{Wt.PL.Theo})$ .

where

- ❖  $\text{W}_{\text{wt. Plat}}$  is the (normalized) weight of the sample at the second TGA plateau.
- ❖  $\text{W}_{\text{end}}$  is 100 %
- ❖  $\text{Wt.PL.Theo} = (\text{W}_{\text{wt. ideal Plat.}} - \text{W}_{\text{end}})/\text{NL}_{\text{ideal}}$
- ❖  $\text{NL}_{\text{ideal}}$  = number of linkers per unit formula ideally (6)
- ❖  $\text{Wt.PL.Theo} = ((442.4 - 100)/6) = 57.0$  %
- ❖  $x = 6 - ((254.9 - 100)/57) = 6 - 2.71 = 3$ .
- ❖ Number of linker defect per unit formula is 3.

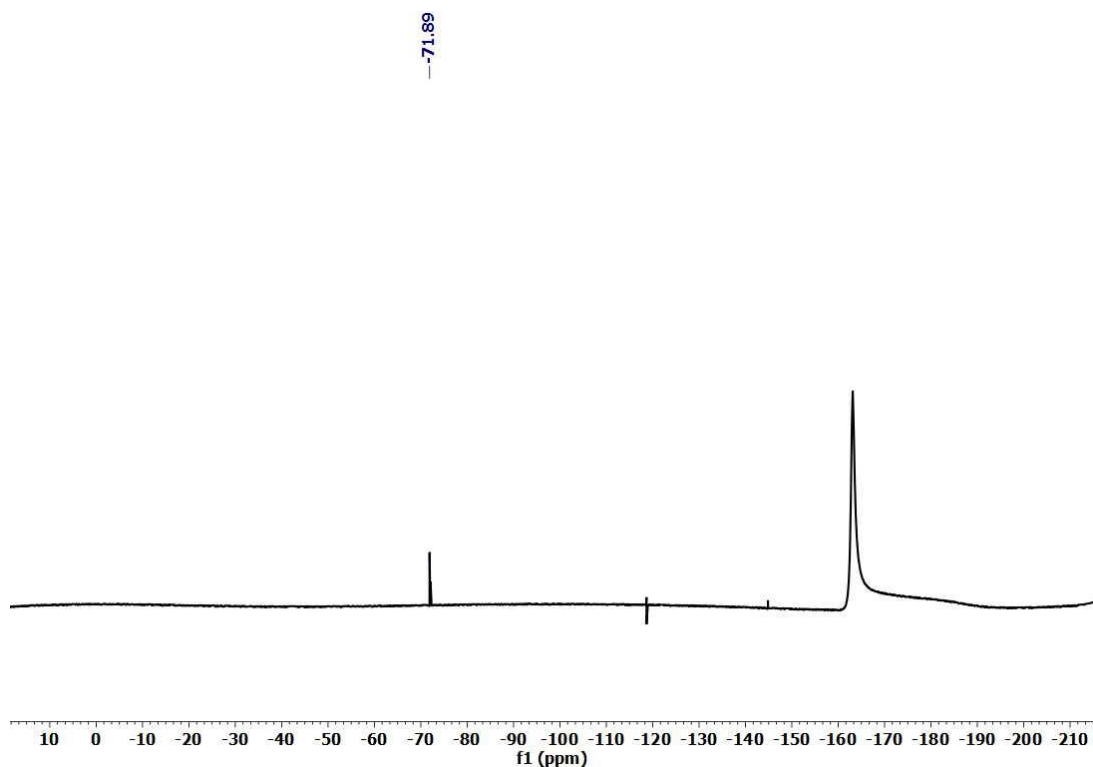

**Figure S7.**  $^{19}\text{F}$  NMR spectrum of digested **1'** in  $\text{DMSO-d}_6$  with 40% HF.

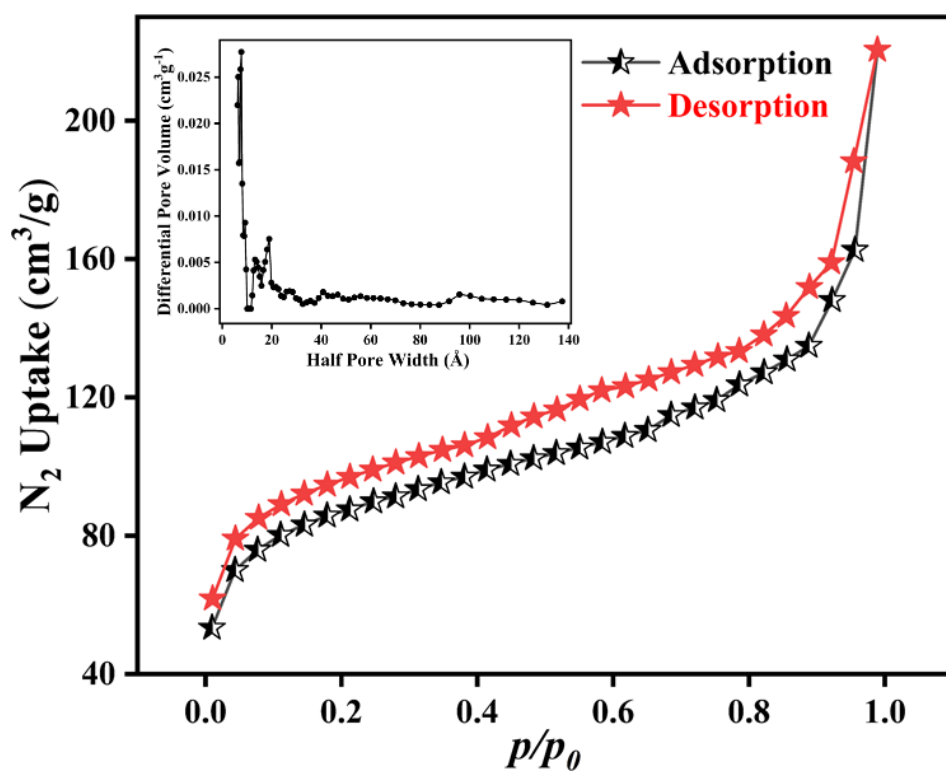

**Figure S8.**  $\text{N}_2$  sorption isotherms of **1'** measured at  $-196\text{ }^\circ\text{C}$  and density functional theory pore-size distribution of compound **1'** (shown in inset).



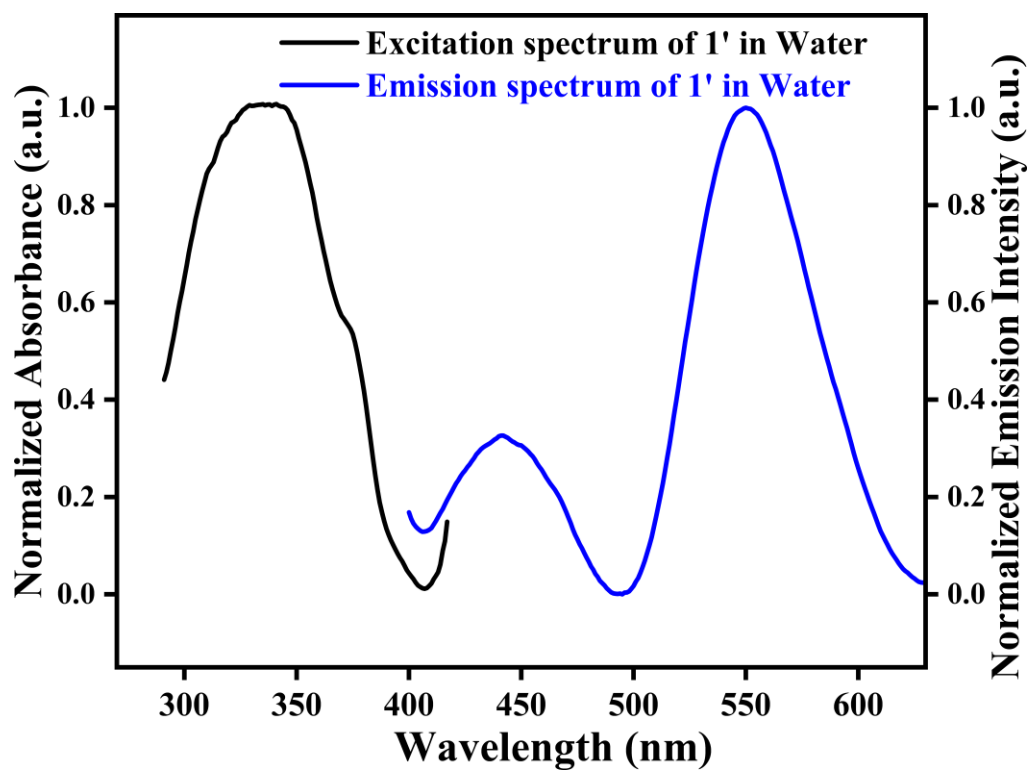

Figure S9. Fluorescence excitation and emission spectra of 1' in water.

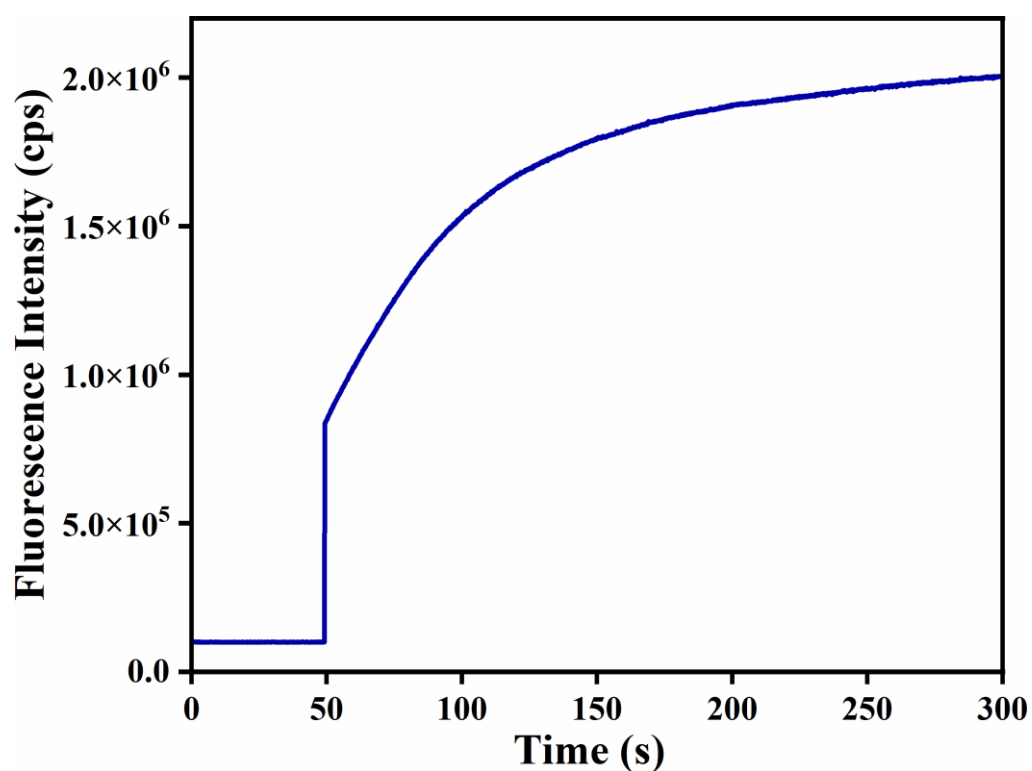

Figure S10. Fluorescence kinetic experiment for hydrazine sensing.

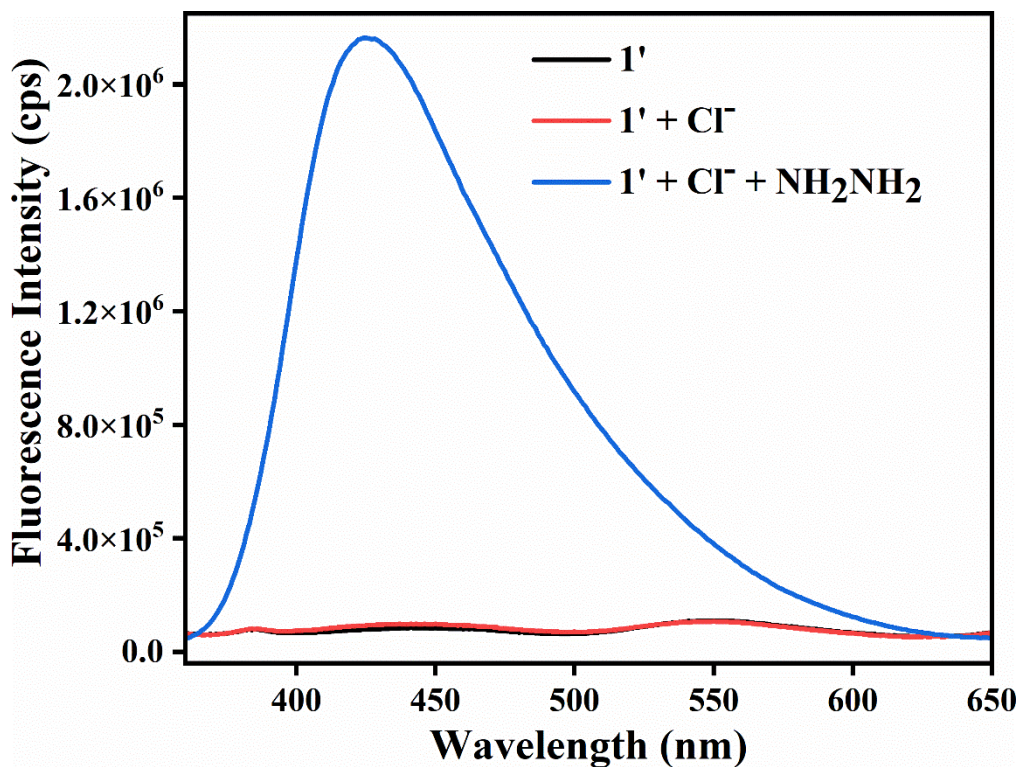

**Figure S11.** The fluorometric turn-on response of  $1'$  towards  $\text{NH}_2\text{NH}_2$  (300  $\mu\text{L}$ , 10 mM) in the presence of  $\text{Cl}^-$  (300  $\mu\text{L}$ , 10 mM).

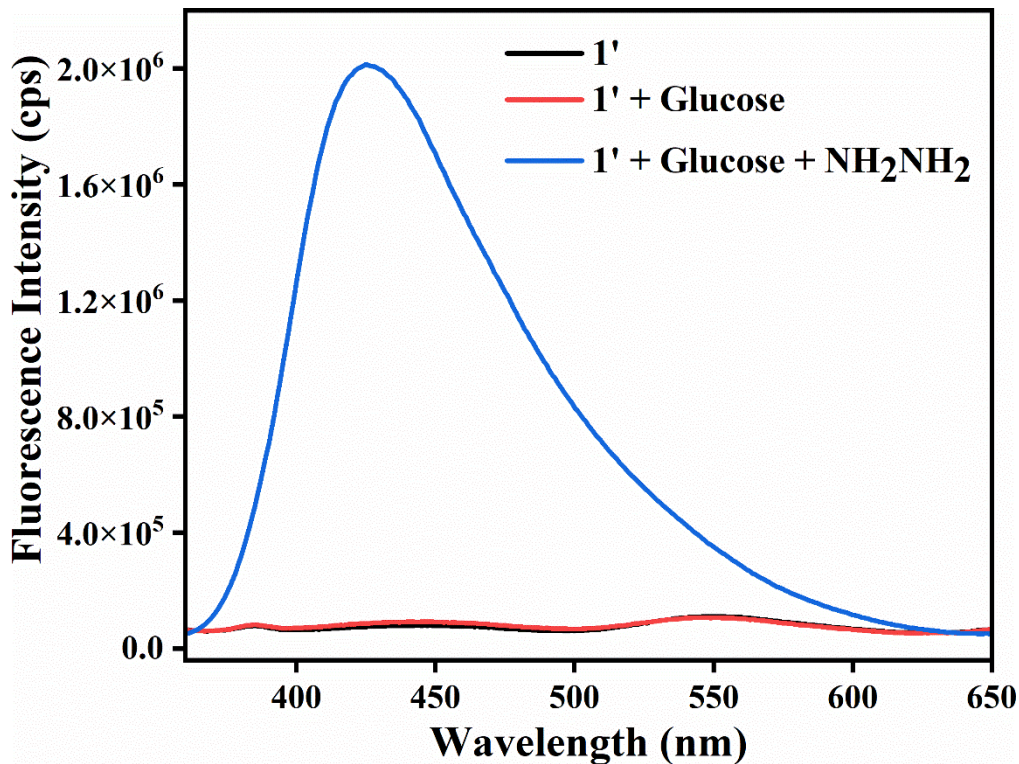

**Figure S12.** The fluorometric turn-on response of  $1'$  towards  $\text{NH}_2\text{NH}_2$  (300  $\mu\text{L}$ , 10 mM) in the presence of Glucose (300  $\mu\text{L}$ , 10 mM).

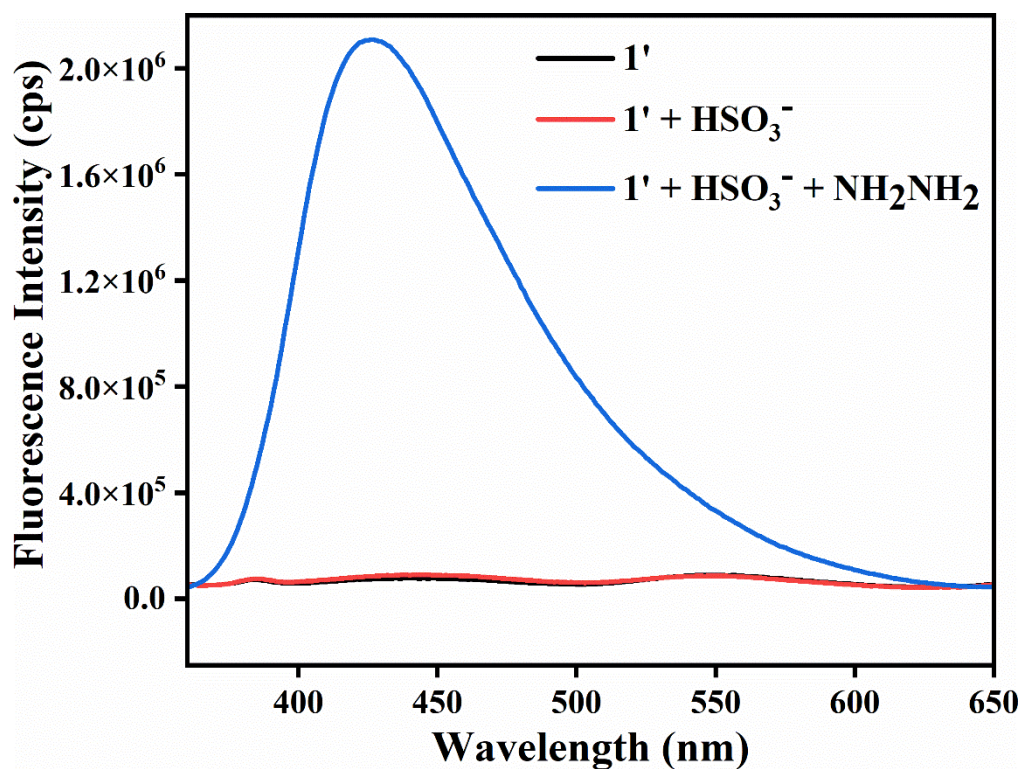

**Figure S13.** The fluorometric turn-on response of **1'** towards  $\text{NH}_2\text{NH}_2$  (300  $\mu\text{L}$ , 10 mM) in the presence of  $\text{HSO}_3^-$  (300  $\mu\text{L}$ , 10 mM).

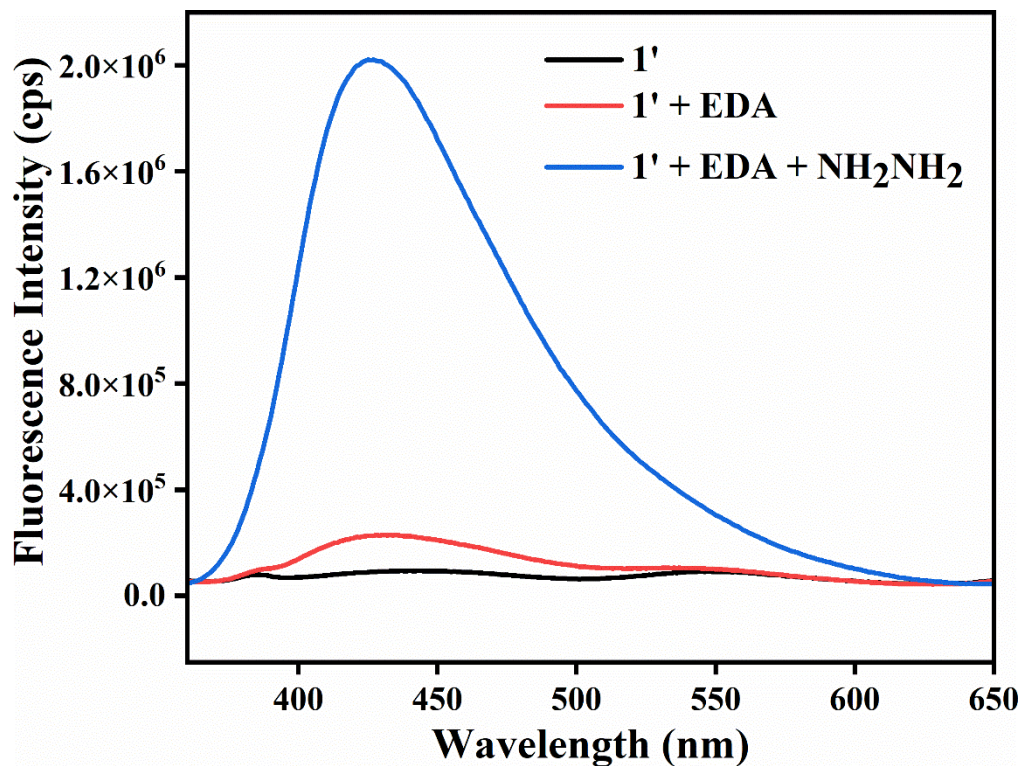

**Figure S14.** The fluorometric turn-on response of **1'** towards  $\text{NH}_2\text{NH}_2$  (300  $\mu\text{L}$ , 10 mM) in the presence of ethylenediamine (300  $\mu\text{L}$ , 10 mM).

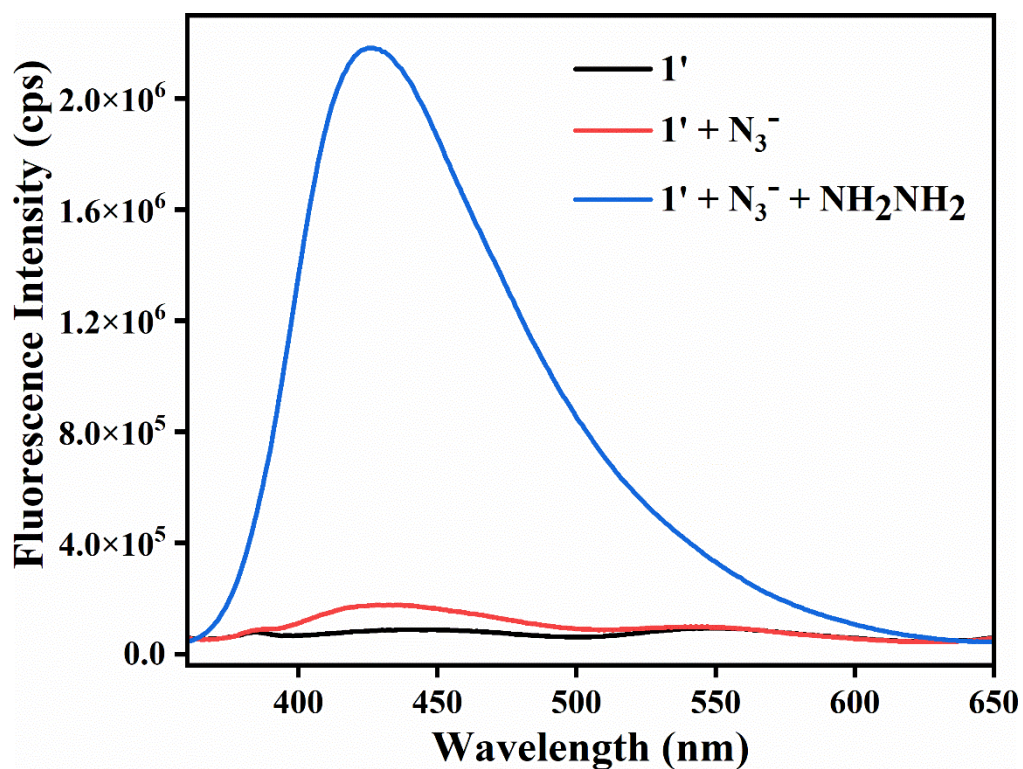

**Figure S15.** The fluorometric turn-on response of **1'** towards  $\text{NH}_2\text{NH}_2$  (300  $\mu\text{L}$ , 10 mM) in the presence of  $\text{N}_3^-$  (300  $\mu\text{L}$ , 10 mM).

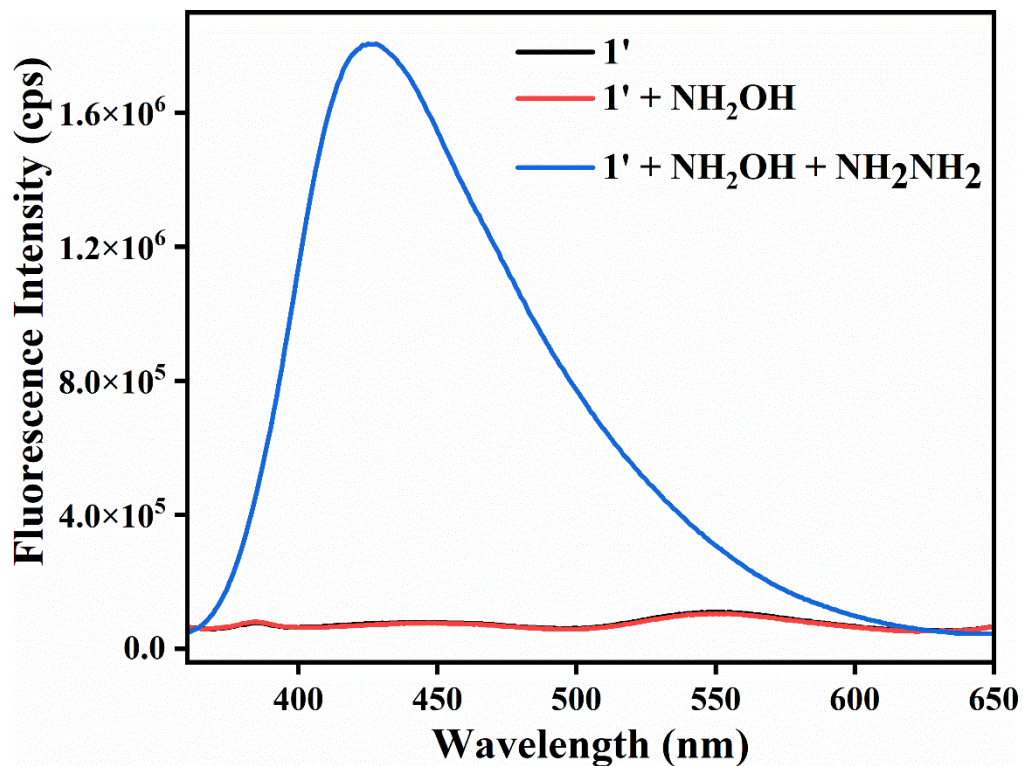

**Figure S16.** The fluorometric turn-on response of **1'** towards  $\text{NH}_2\text{NH}_2$  (300  $\mu\text{L}$ , 10 mM) in the presence of  $\text{NH}_2\text{OH}$  (300  $\mu\text{L}$ , 10 mM).

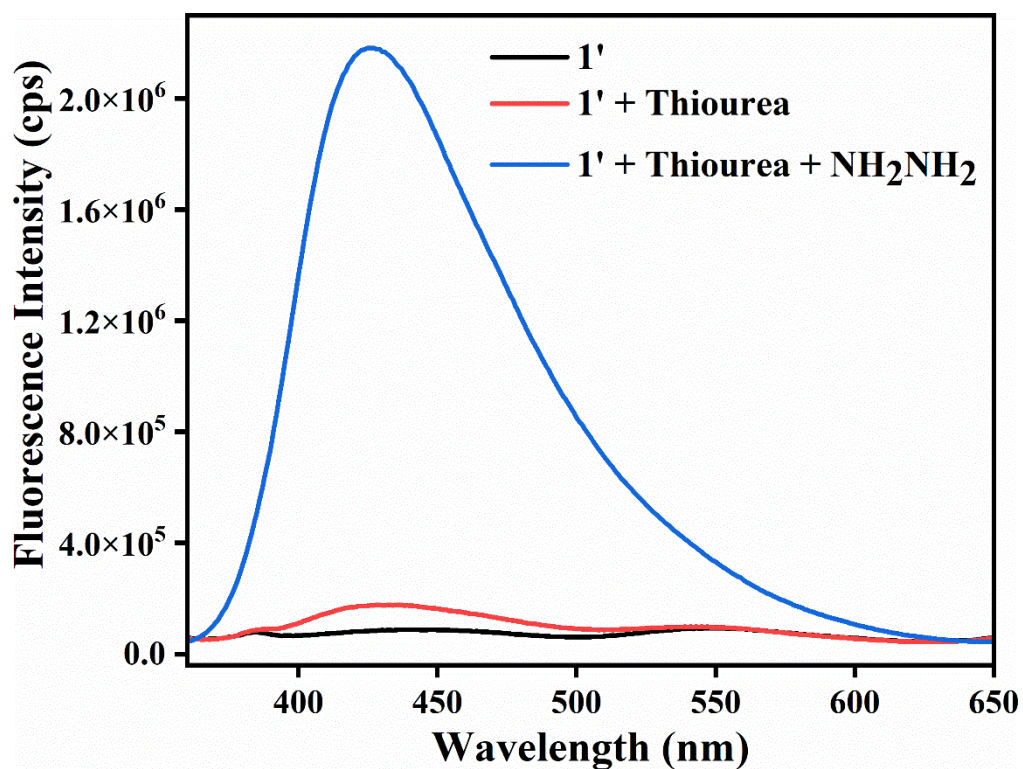

**Figure S17.** The fluorometric turn-on response of **1'** towards NH<sub>2</sub>NH<sub>2</sub> (300 μL, 10 mM) in the presence of thiourea (300 μL, 10 mM).

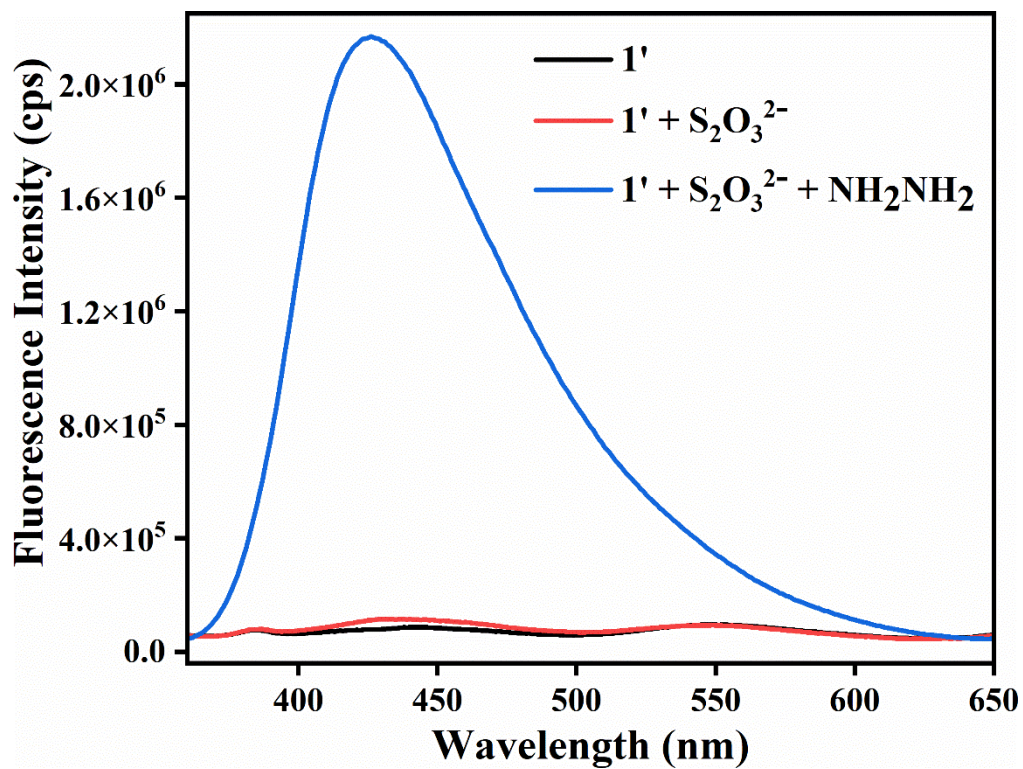

**Figure S18.** The fluorometric turn-on response of **1'** towards NH<sub>2</sub>NH<sub>2</sub> (300 μL, 10 mM) in the presence of S<sub>2</sub>O<sub>3</sub><sup>2-</sup> (300 μL, 10 mM).

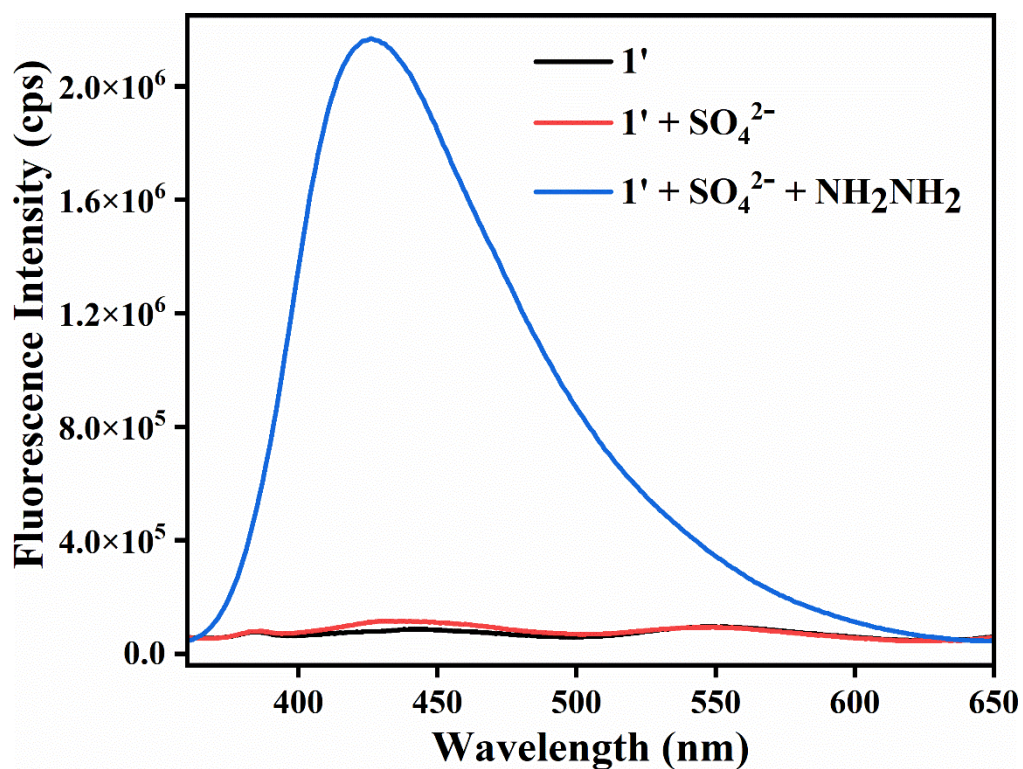

**Figure S19.** The fluorometric turn-on response of **1'** towards NH<sub>2</sub>NH<sub>2</sub> (300 μL, 10 mM) in the presence of SO<sub>4</sub><sup>2-</sup> (300 μL, 10 mM).

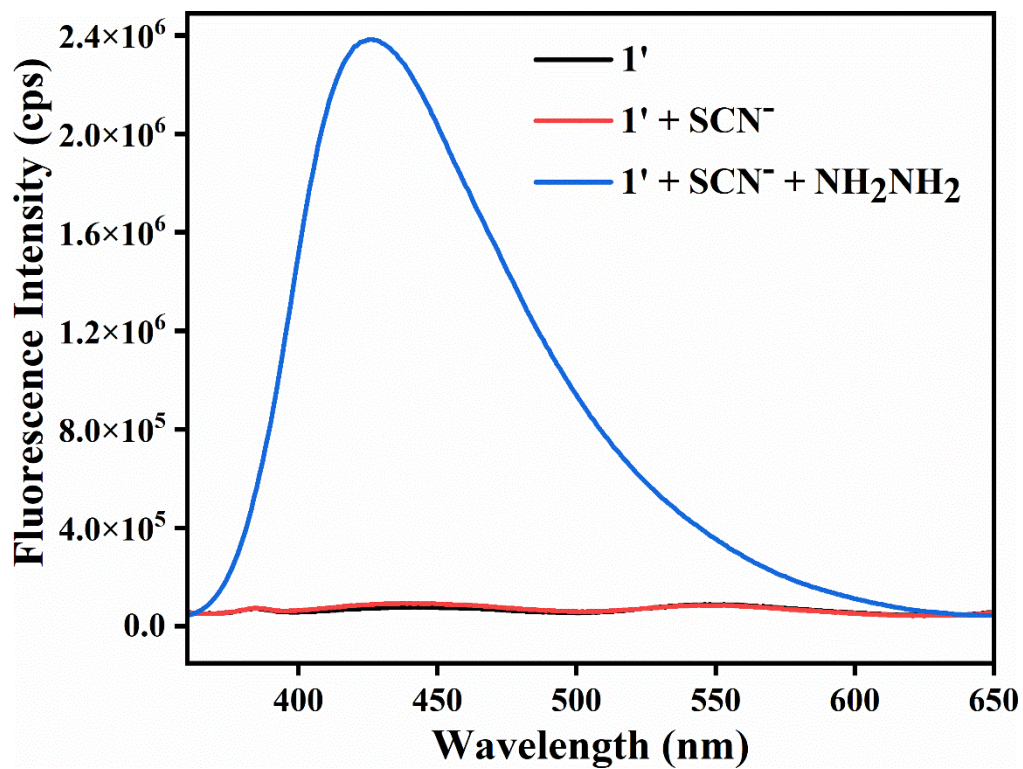

**Figure S20.** The fluorometric turn-on response of **1'** towards NH<sub>2</sub>NH<sub>2</sub> (300 μL, 10 mM) in the presence of SCN<sup>-</sup> (300 μL, 10 mM).

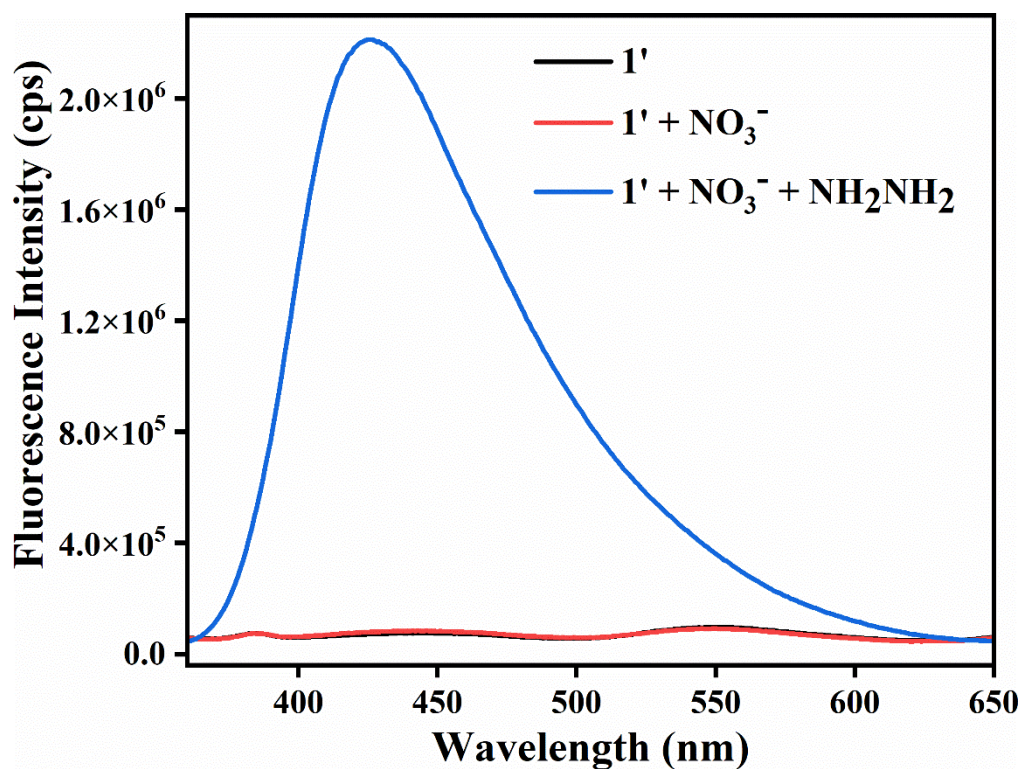

**Figure S21.** The fluorometric turn-on response of **1'** towards  $\text{NH}_2\text{NH}_2$  (300  $\mu\text{L}$ , 10 mM) in the presence of  $\text{NO}_3^-$  (300  $\mu\text{L}$ , 10 mM).

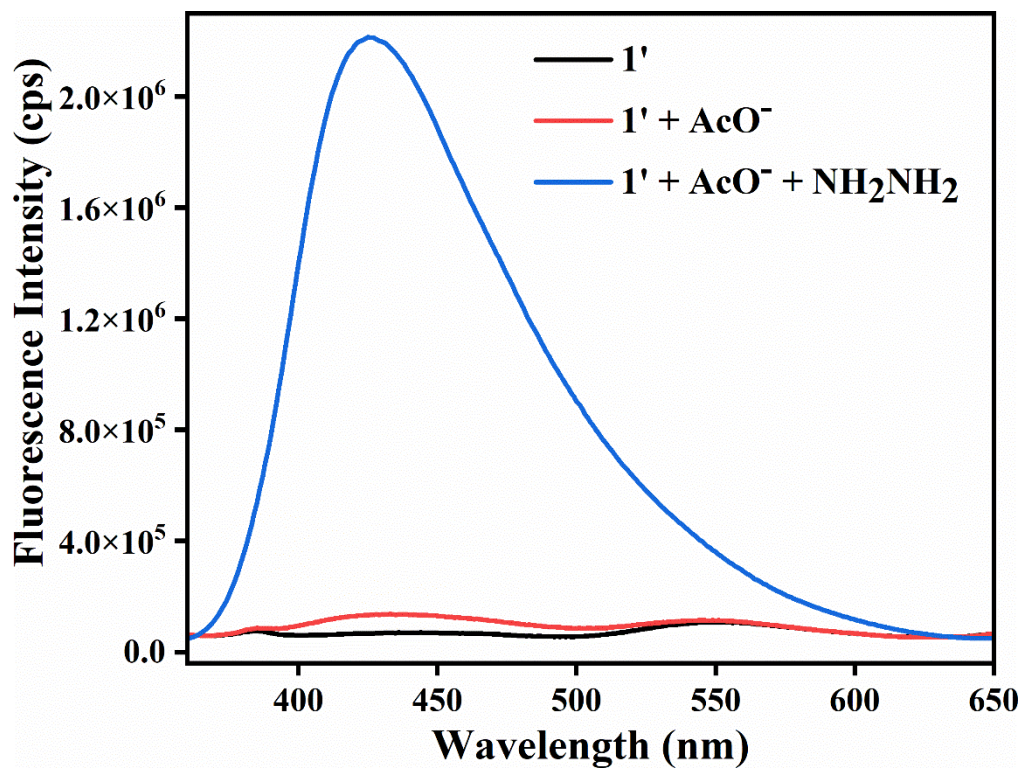

**Figure S22.** The fluorometric turn-on response of **1'** towards  $\text{NH}_2\text{NH}_2$  (300  $\mu\text{L}$ , 10 mM) in the presence of  $\text{CH}_3\text{COO}^-$  (300  $\mu\text{L}$ , 10 mM).

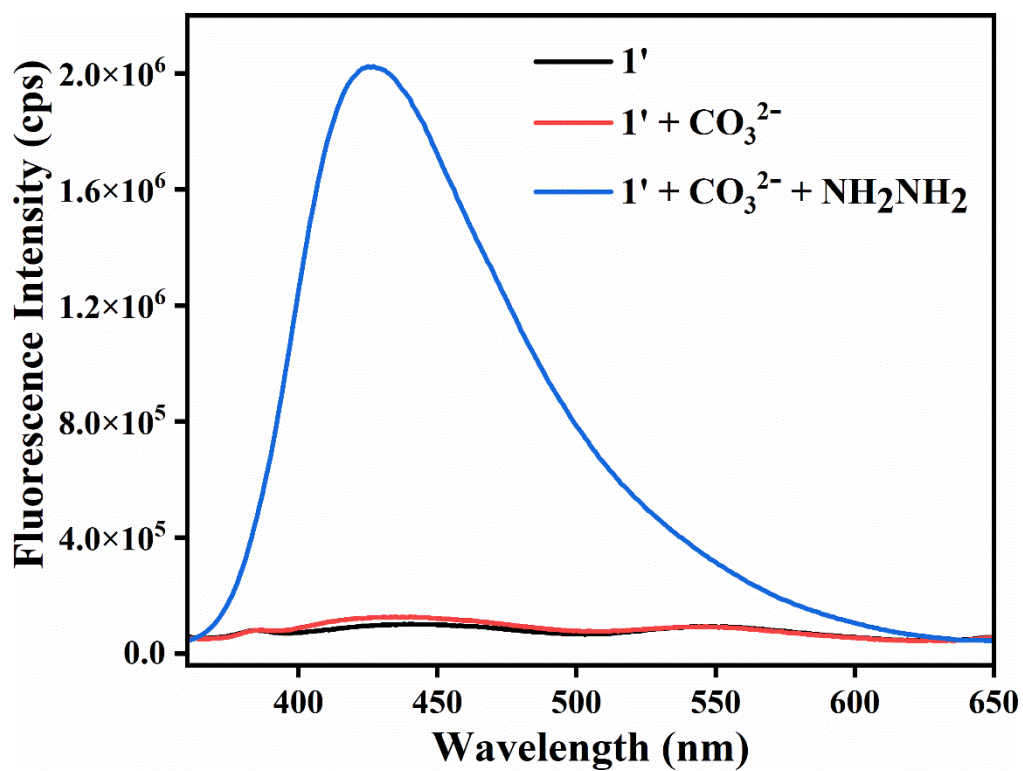

**Figure S23.** The fluorometric turn-on response of **1'** towards  $\text{NH}_2\text{NH}_2$  (300  $\mu\text{L}$ , 10 mM) in the presence of  $\text{CO}_3^{2-}$  (300  $\mu\text{L}$ , 10 mM).

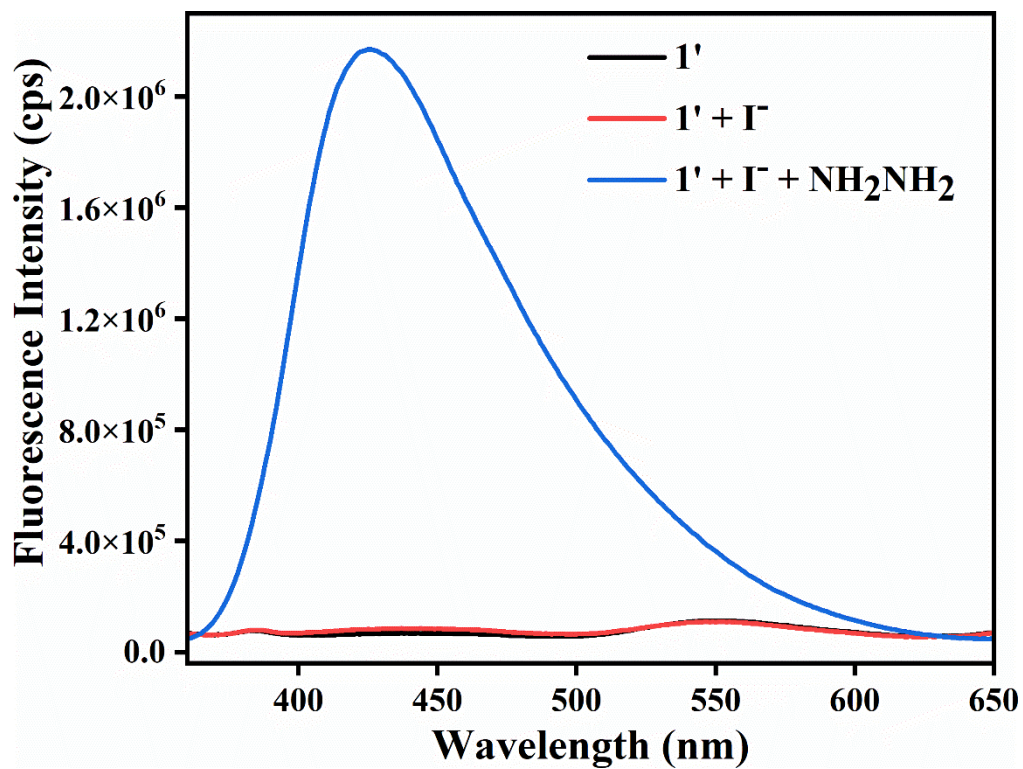

**Figure S24.** The fluorometric turn-on response of **1'** towards  $\text{NH}_2\text{NH}_2$  (300  $\mu\text{L}$ , 10 mM) in the presence of  $\text{I}^-$  (300  $\mu\text{L}$ , 10 mM).



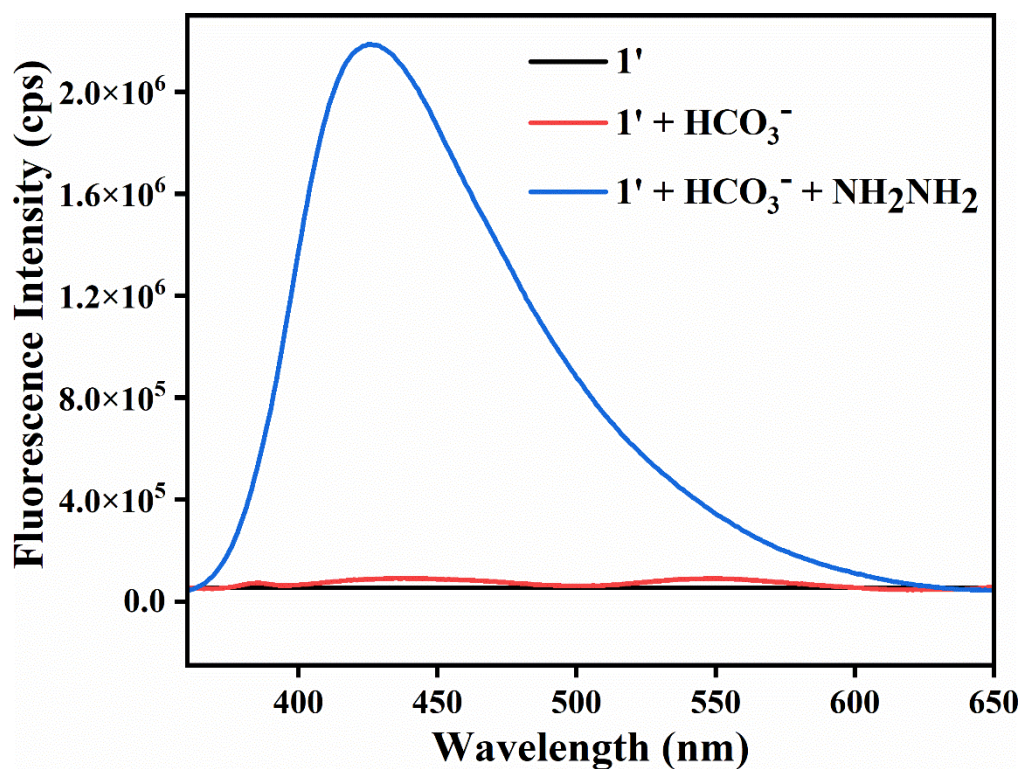

**Figure S25.** The fluorometric turn-on response of **1'** towards  $\text{NH}_2\text{NH}_2$  (300  $\mu\text{L}$ , 10 mM) in the presence of  $\text{HCO}_3^-$  (300  $\mu\text{L}$ , 10 mM).

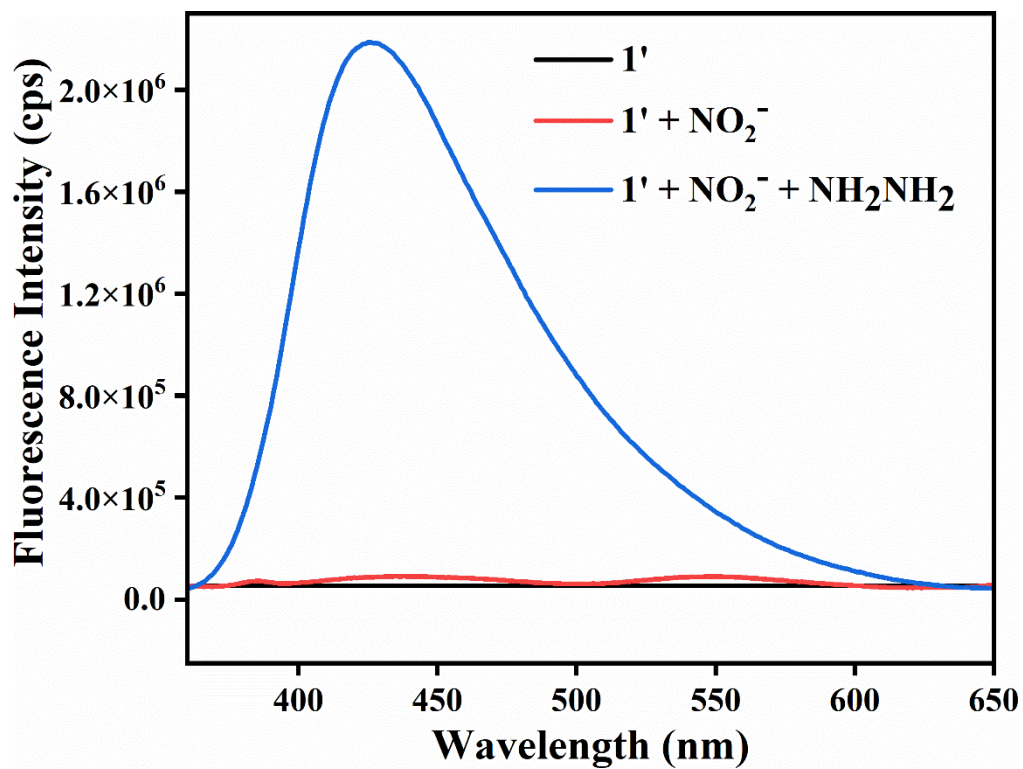

**Figure S26.** The fluorometric turn-on response of **1'** towards  $\text{NH}_2\text{NH}_2$  (300  $\mu\text{L}$ , 10 mM) in the presence of  $\text{NO}_2^-$  (300  $\mu\text{L}$ , 10 mM).

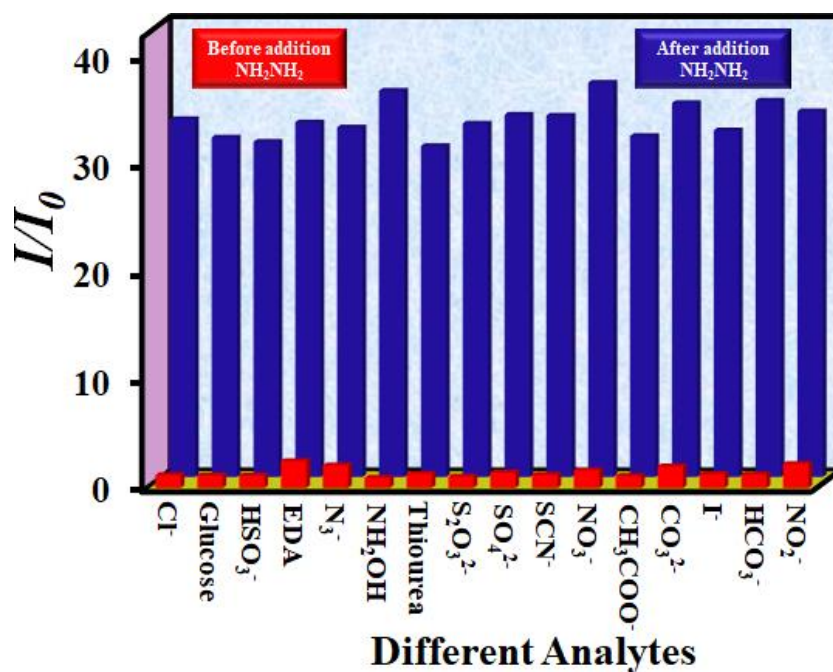

Figure S27. Selectivity of 1' towards NH<sub>2</sub>NH<sub>2</sub> in the presence of other interfering analytes.

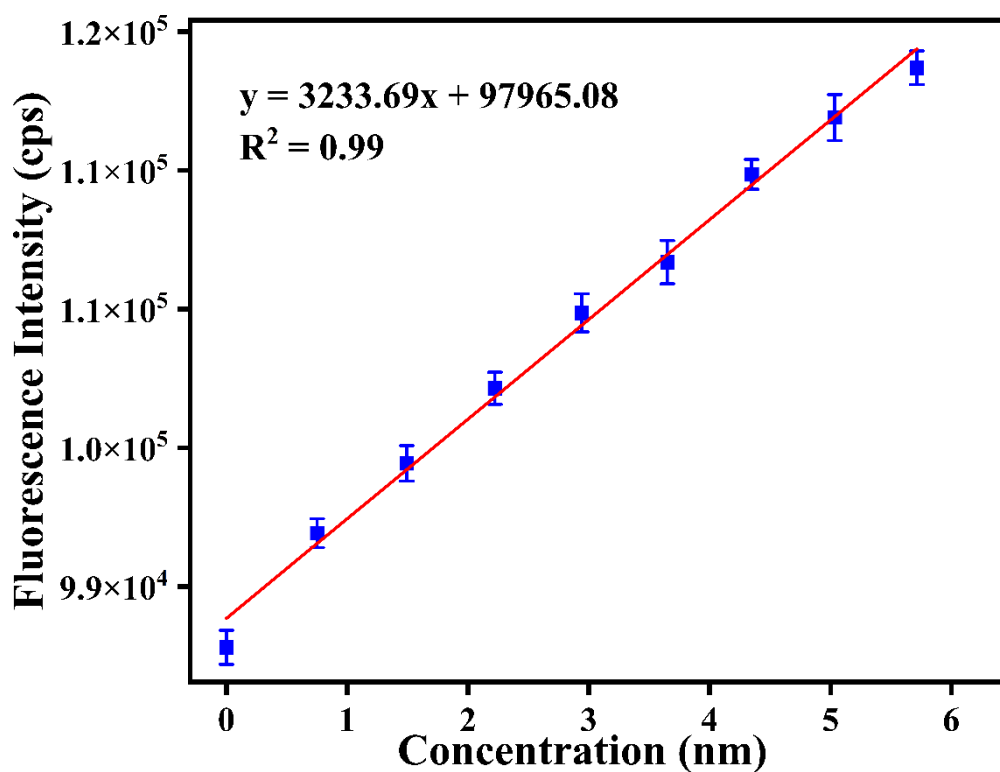

Figure S28. Change in the fluorescence intensity of 1' in water as a function of concentration of NH<sub>2</sub>NH<sub>2</sub> (with error bar).

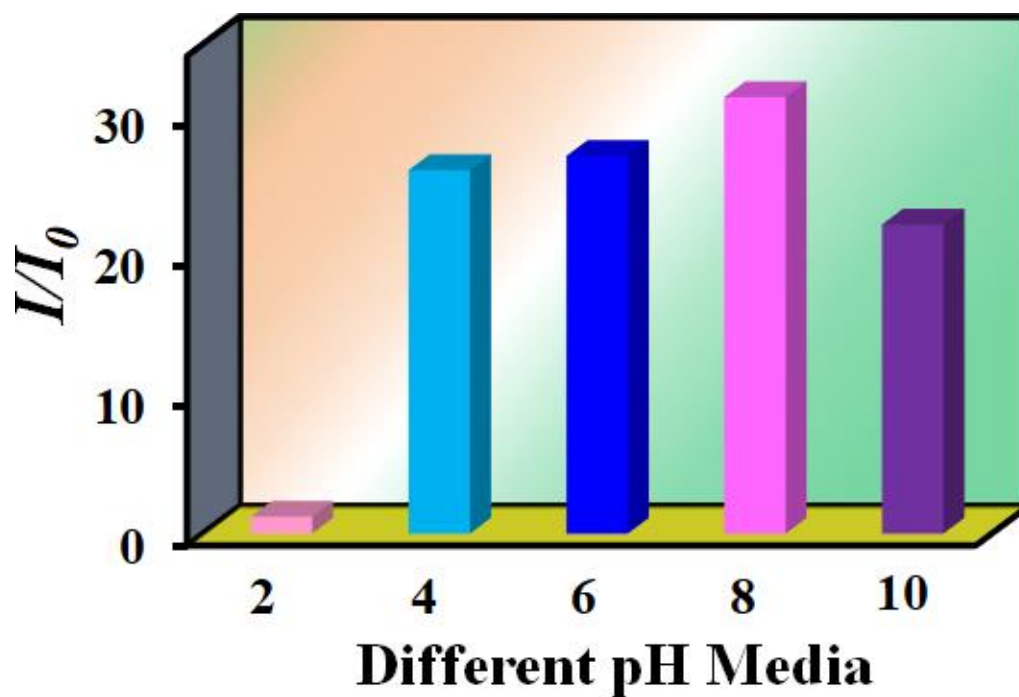

Figure S29. Detection of  $\text{NH}_2\text{NH}_2$  in different pH media.

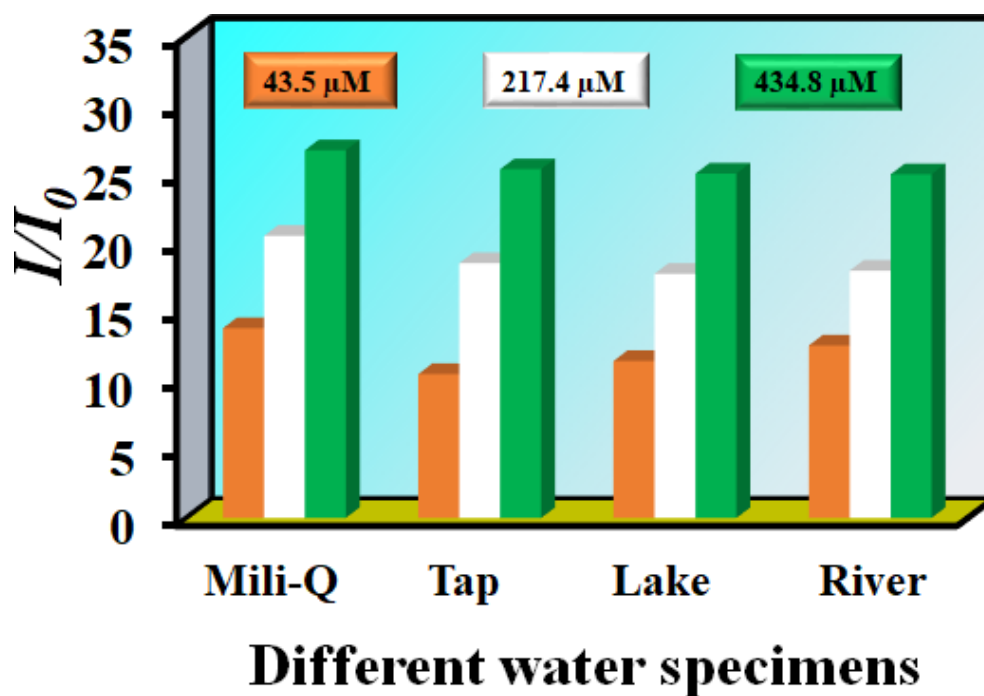

Figure S30. Detection of  $\text{NH}_2\text{NH}_2$  in various real water specimen with different concentration.

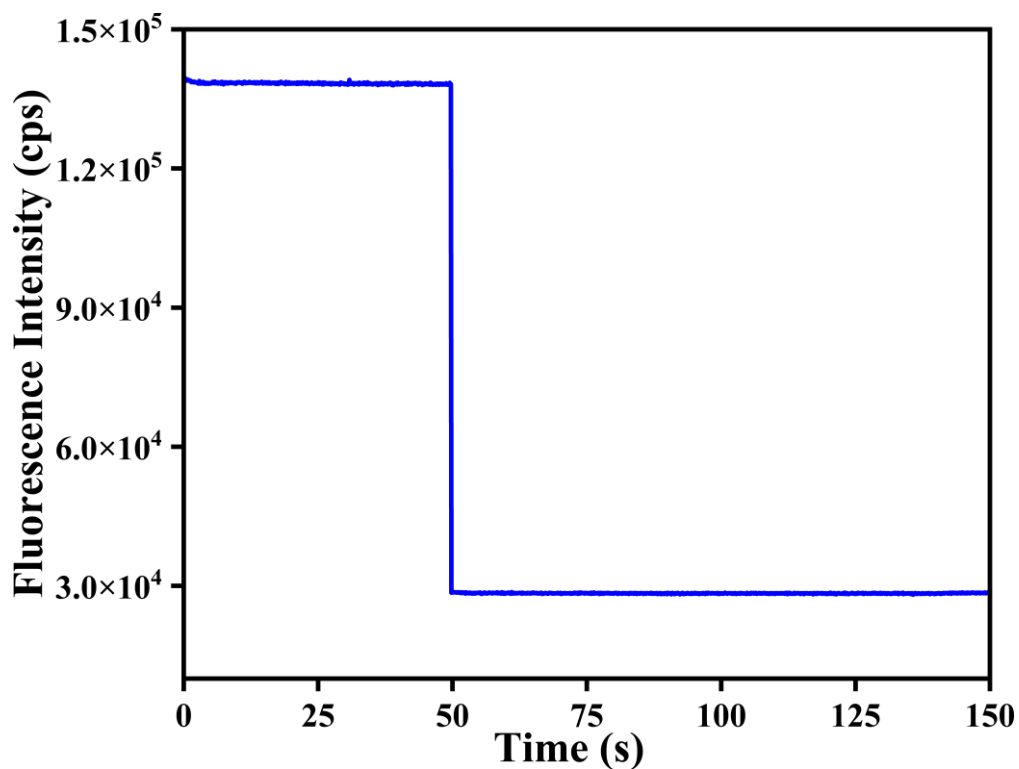

**Figure S31.** Fluorescence kinetic experiment for nicardipine sensing.

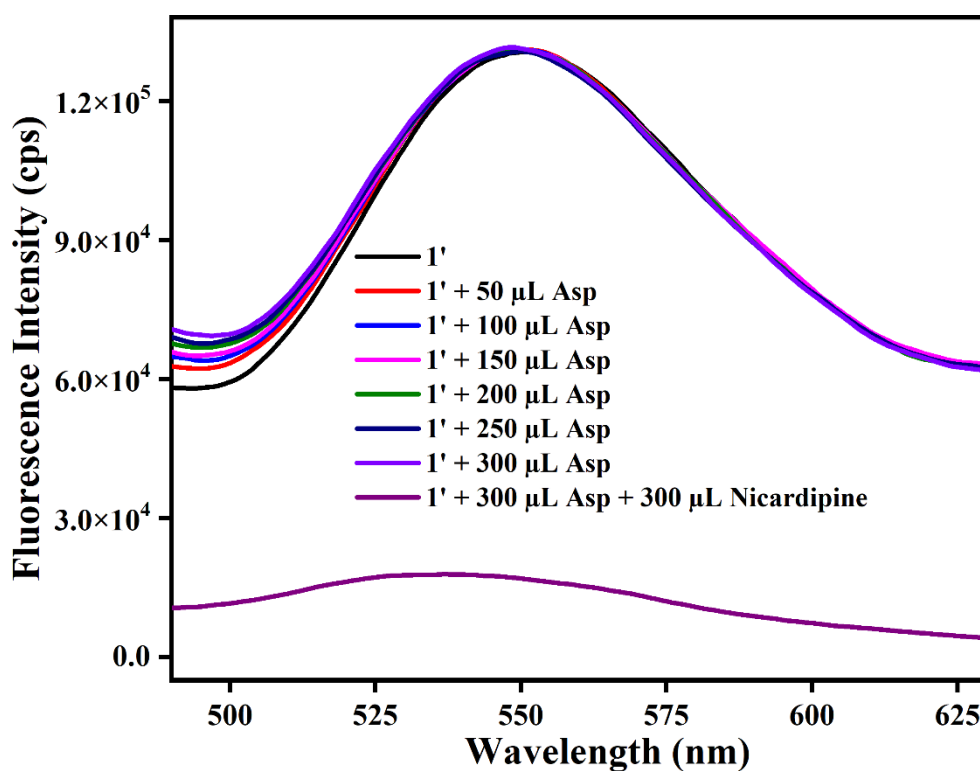

**Figure S32.** The fluorometric turn-off response of **1'** towards nicardipine presence of aspartic acid (300  $\mu\text{L}$ , 5 mM).

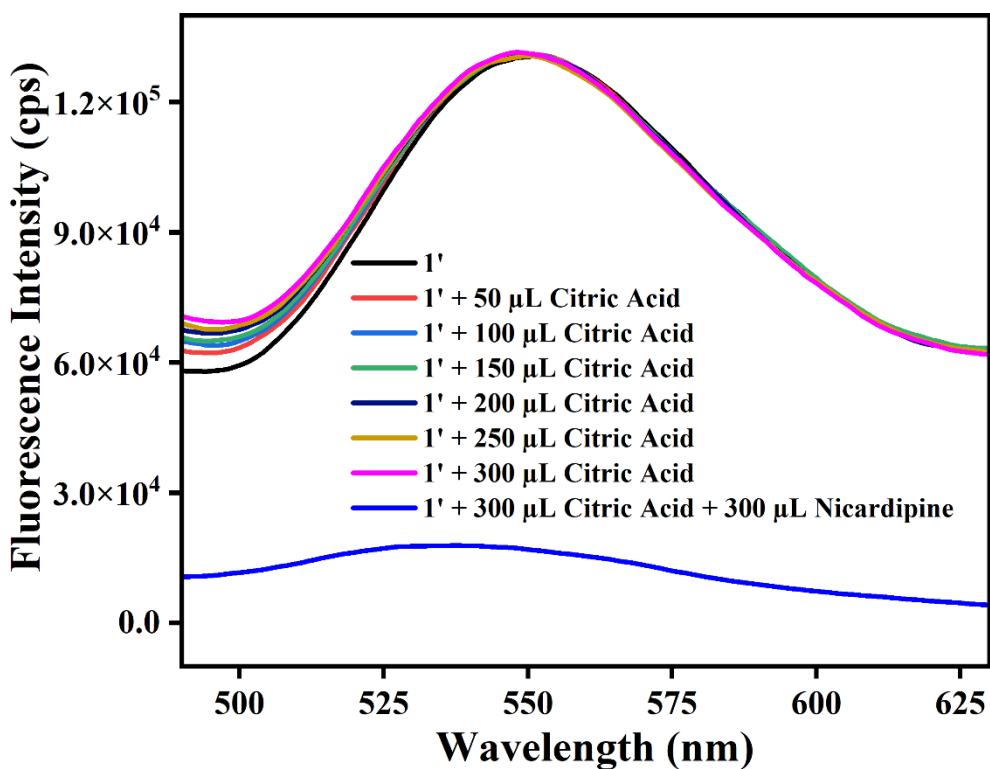

**Figure S33.** The fluorometric turn-off response of 1' towards nicardipine presence of citric acid.

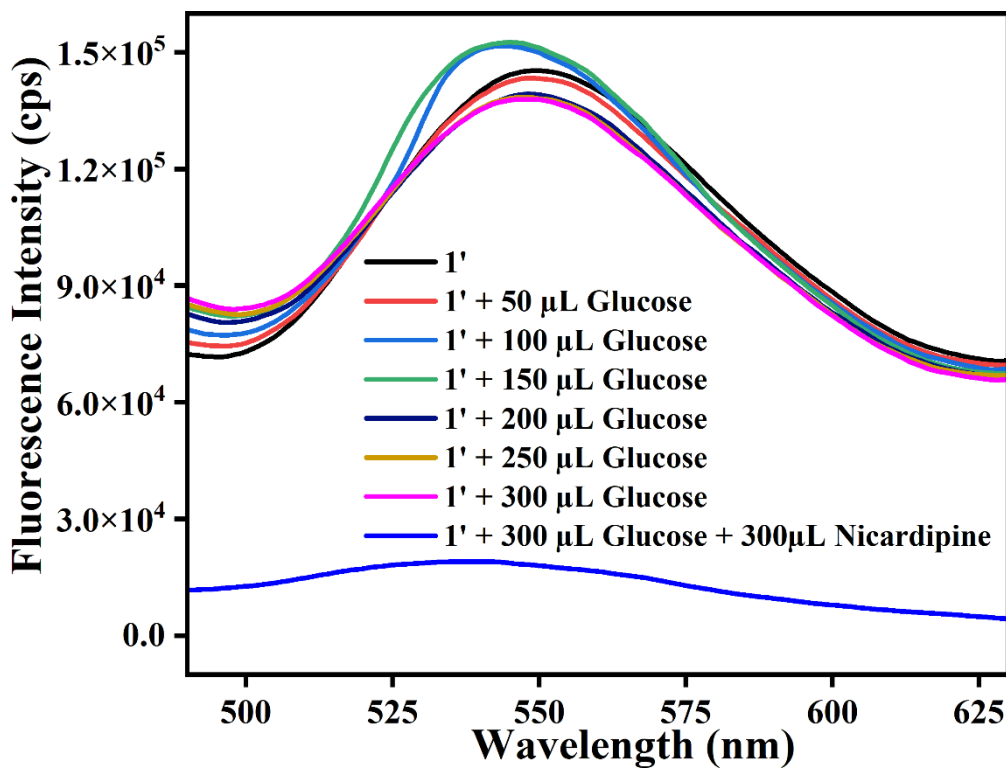

**Figure S34.** The fluorometric turn-off response of 1' towards nicardipine presence of glucose.

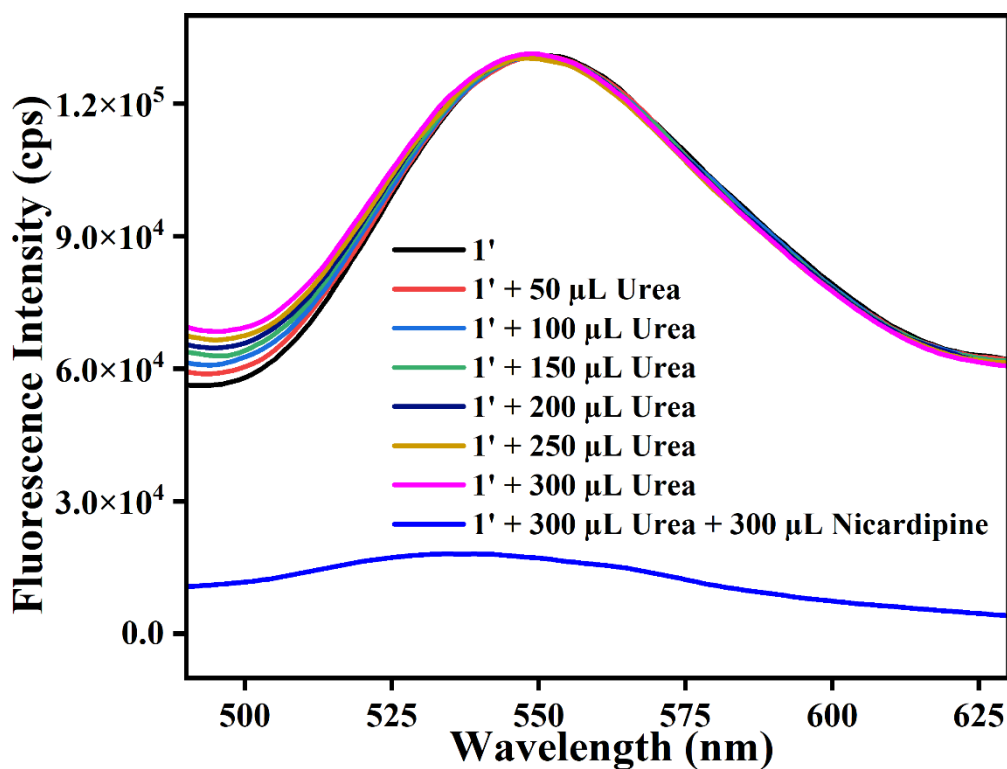

Figure S35. The fluorometric turn-off response of **1'** towards nicardipine presence of urea.

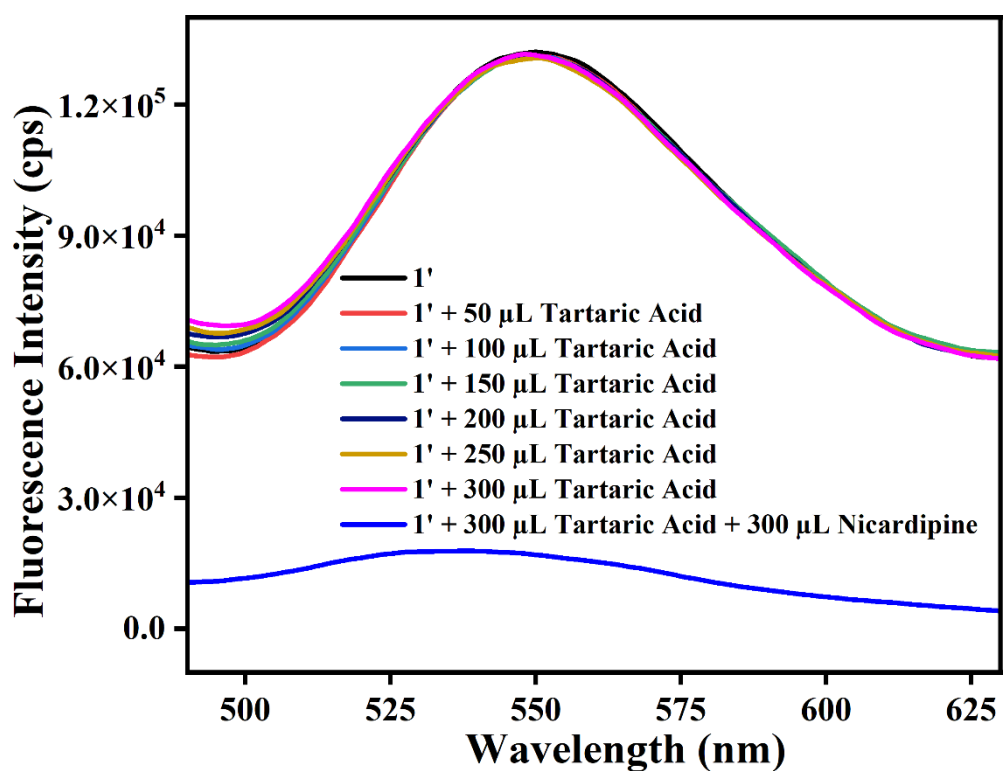

Figure S36. The fluorometric turn-off response of **1'** towards nicardipine presence of tartaric acid.

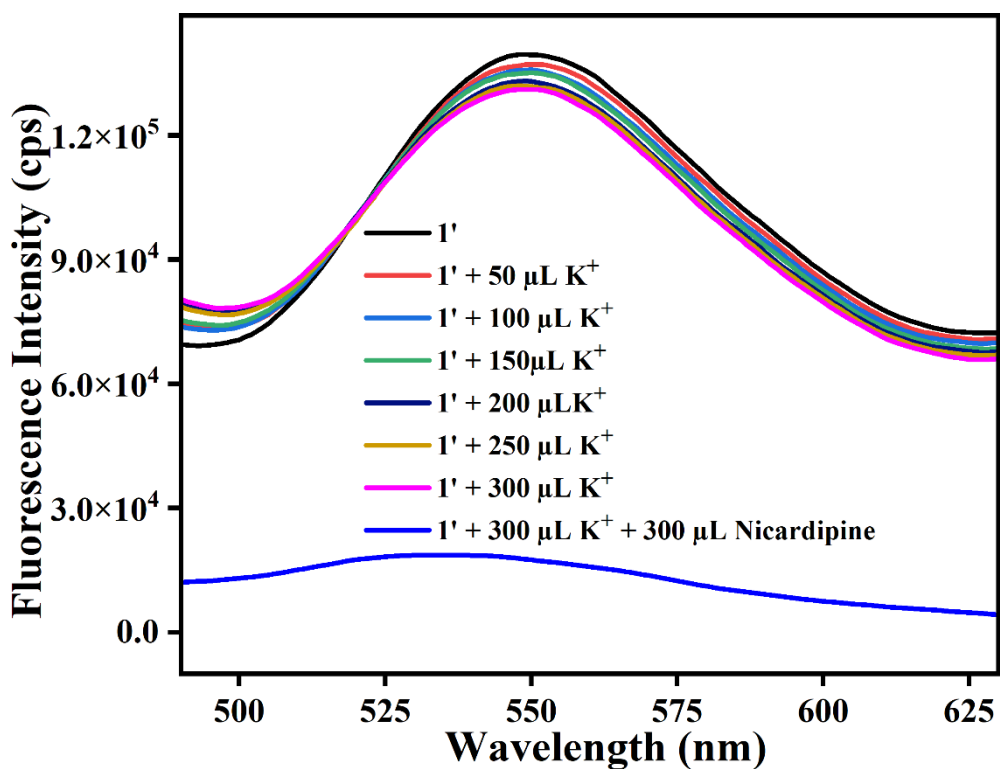

**Figure S37.** The fluorometric turn-off response of **1'** towards nicardipine the presence of  $K^+$ .

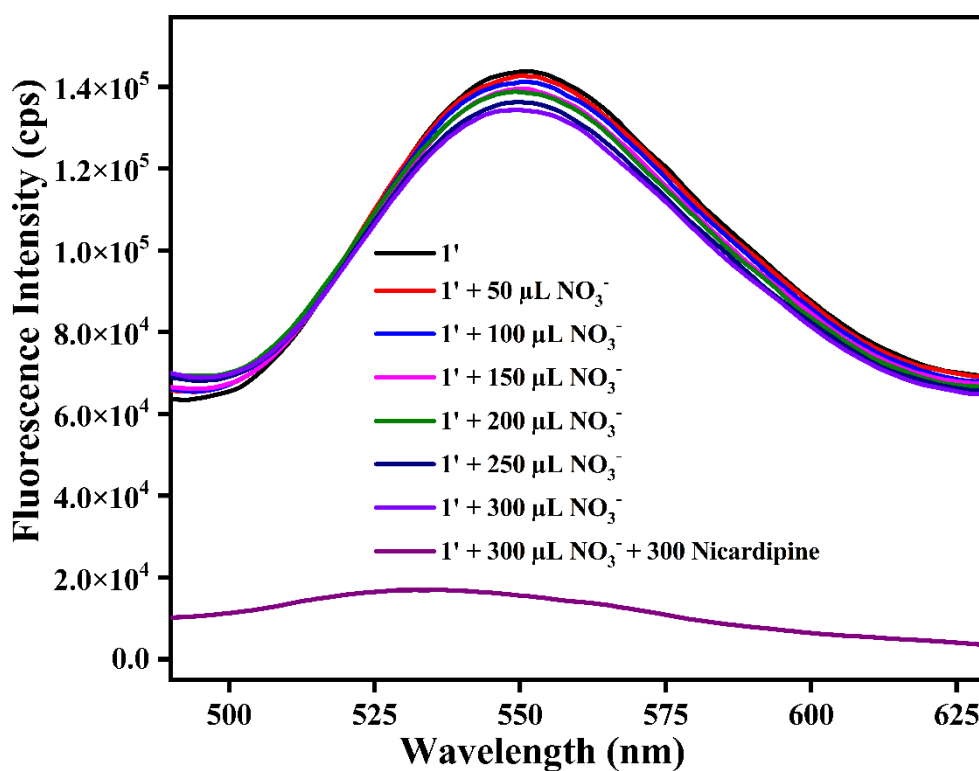

**Figure S38.** The fluorometric turn-off response of **1'** towards nicardipine(300  $\mu$ L, 5 mM) in the presence of  $NO_3^-$  (300  $\mu$ L, 5 mM).

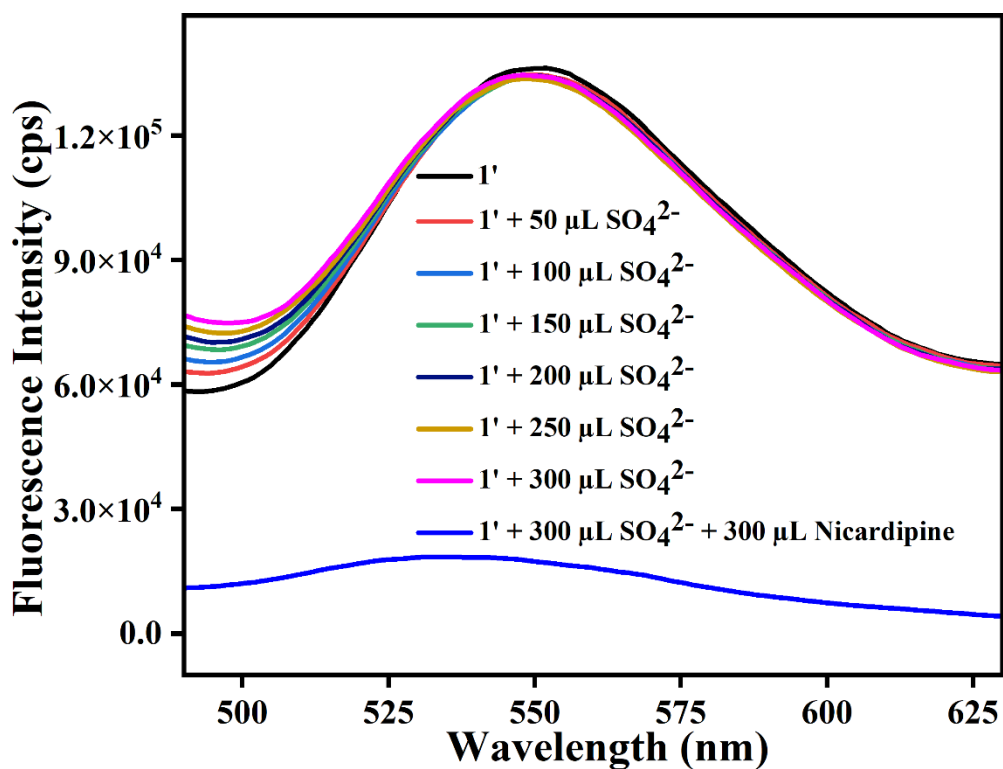

**Figure S39.** The fluorometric turn-off response of **1'** towards nicardipine presence of  $\text{SO}_4^{2-}$ .

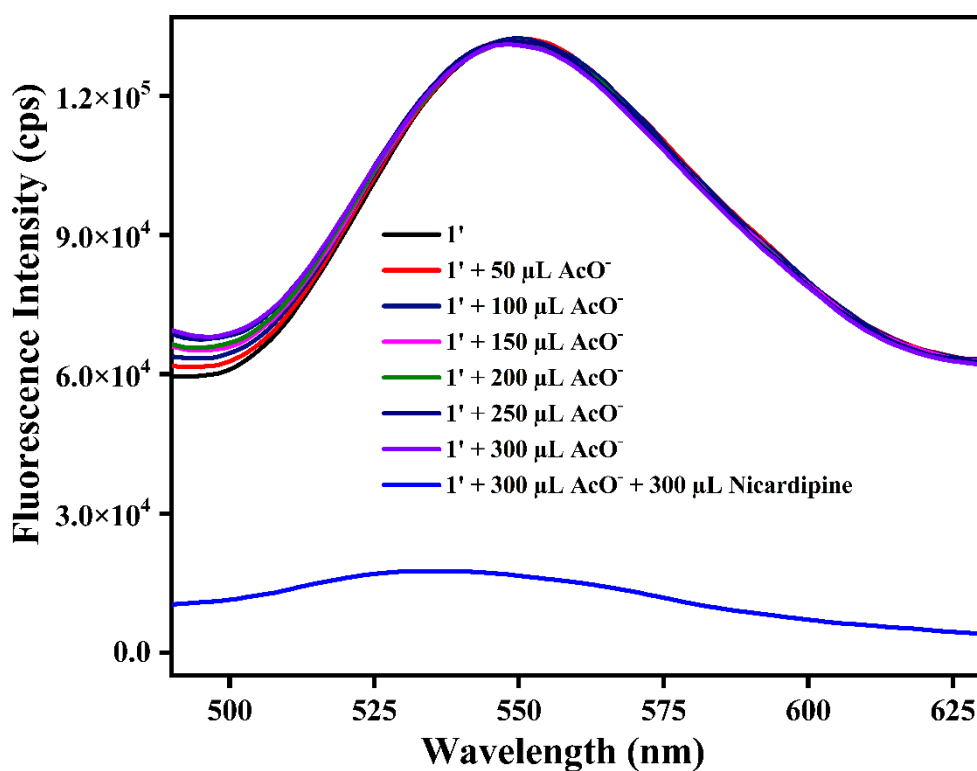

**Figure S40.** The fluorometric turn-off response of **1'** towards nicardipine presence of  $\text{CH}_3\text{COO}^-$ .



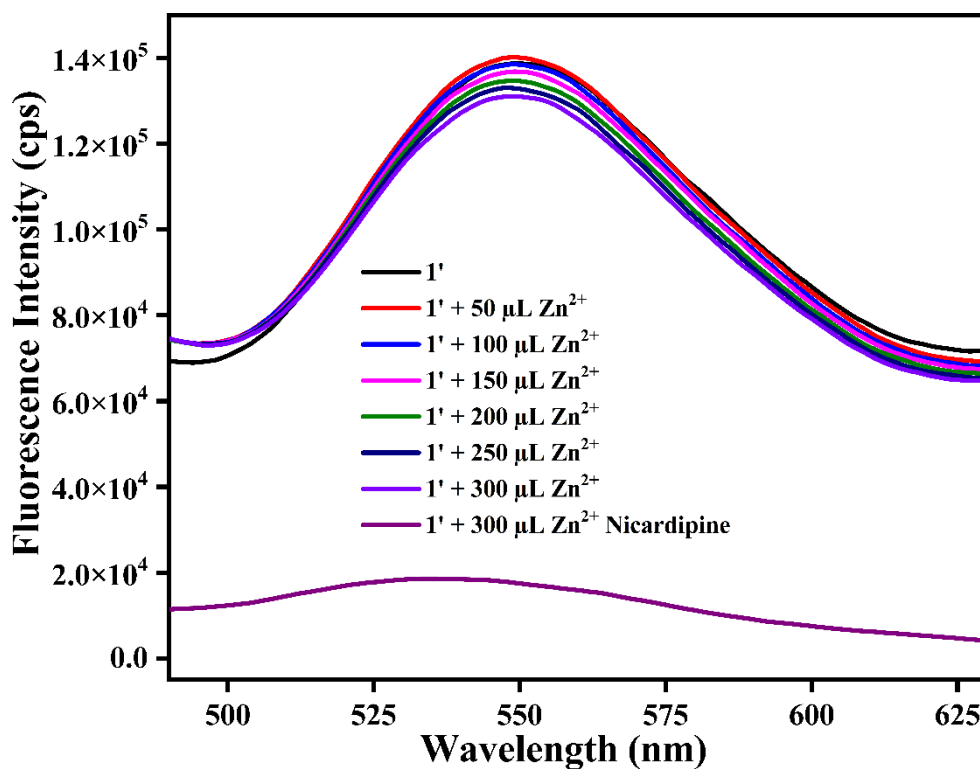

**Figure S41.** The fluorometric turn-off response of **1'** towards nicardipine(300 μL, 5 mM) in the presence of Zn<sup>2+</sup> (300 μL, 5 mM).

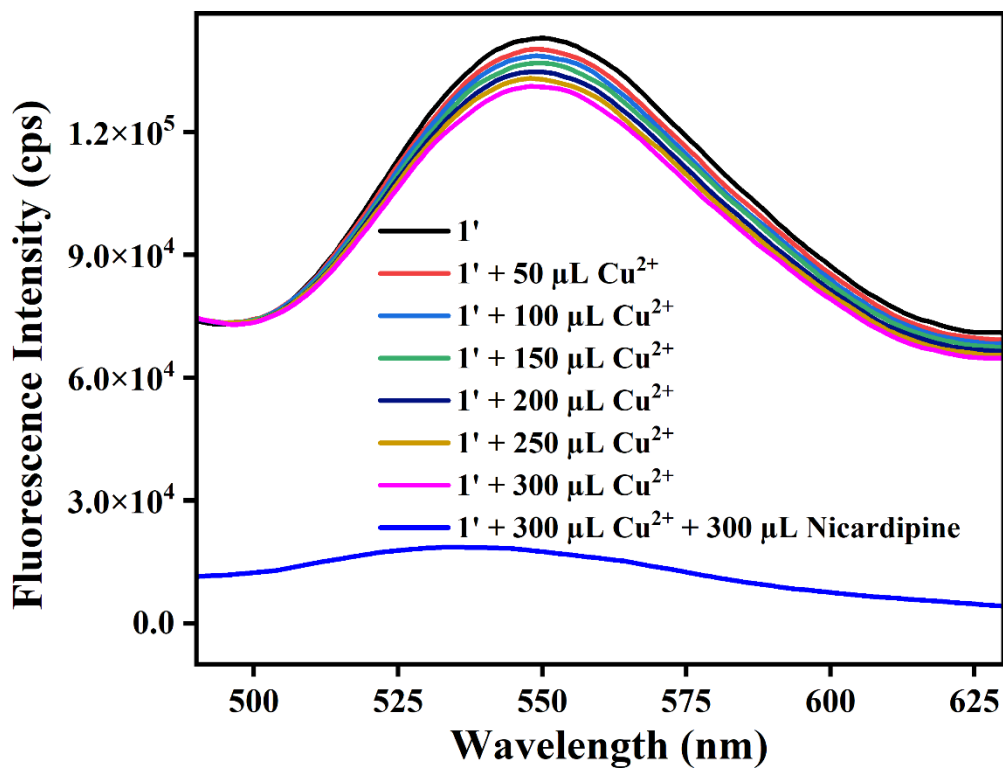

**Figure S42.** The fluorometric turn-off response of **1'** towards nicardipine presence of Cu<sup>2+</sup>.

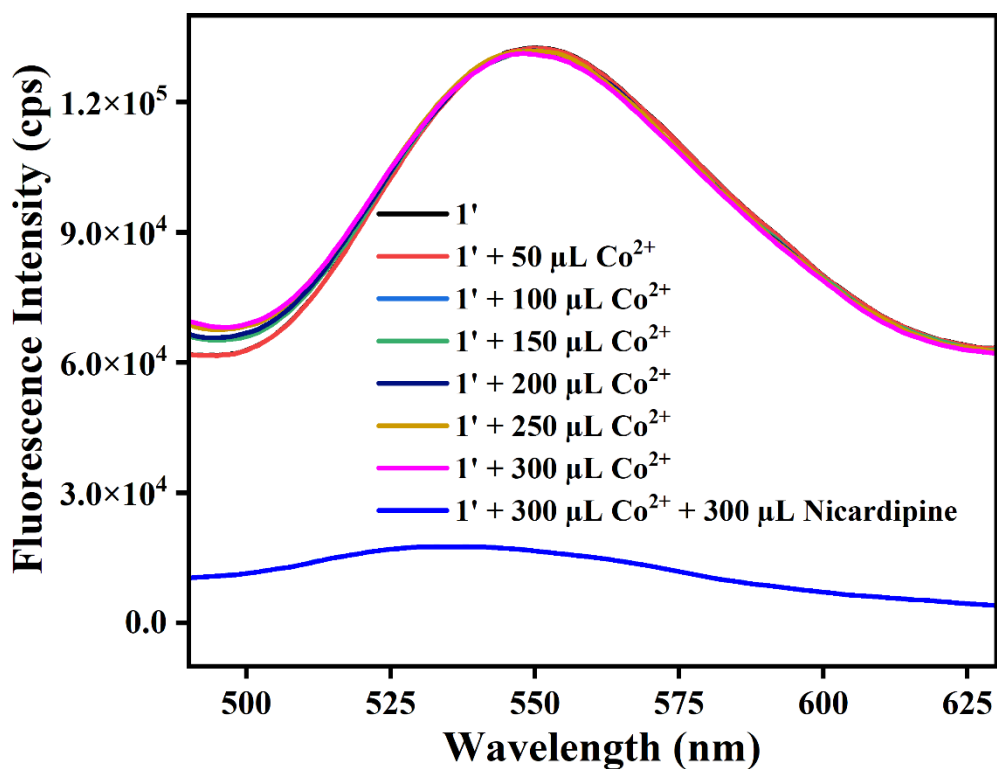

Figure S43. The fluorometric turn-off response of 1' towards nicardipine presence of Co<sup>2+</sup>.

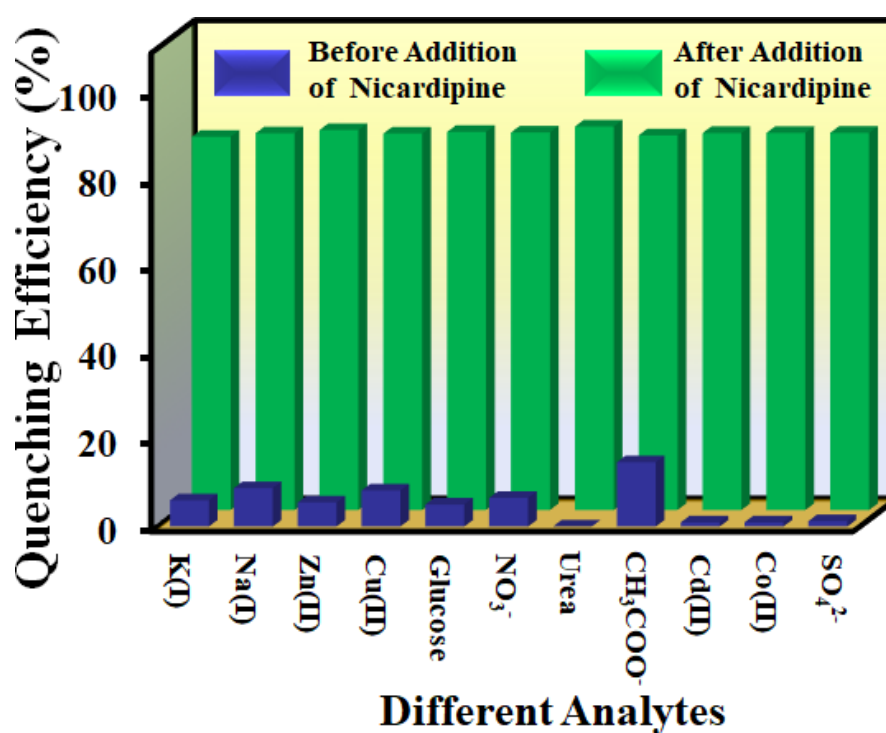

Figure S44. Selectivity of 1' towards nicardipine sensing in the presence of other analytes.

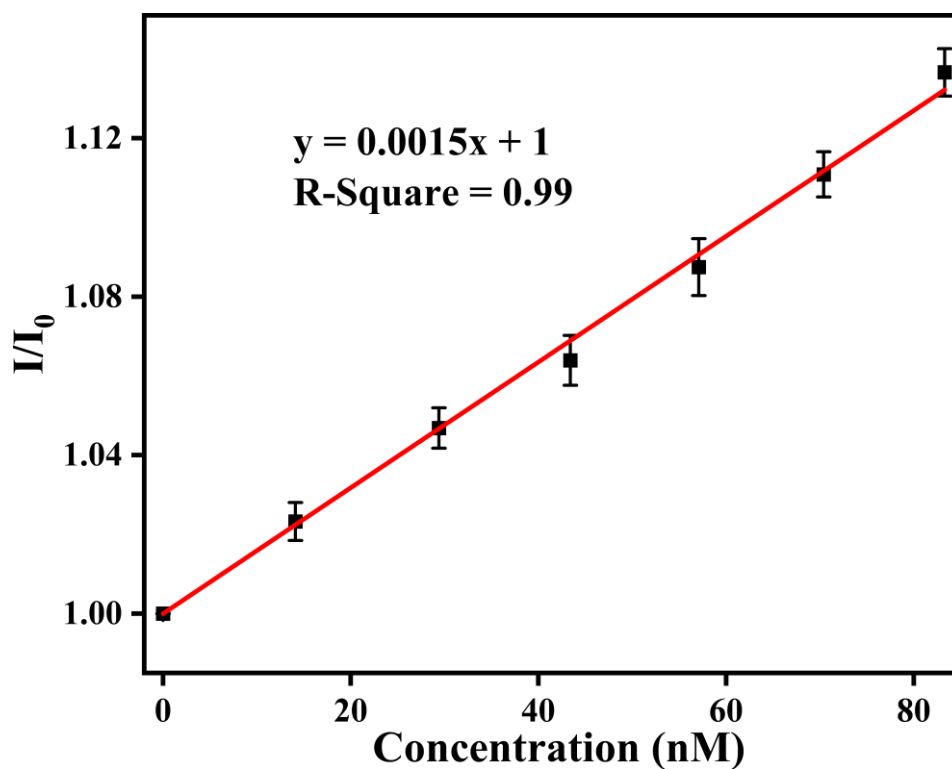

**Figure S45.** Stern-Volmer plot for the fluorometric sensing of nicardipine using the probe **1'** (with error bars).

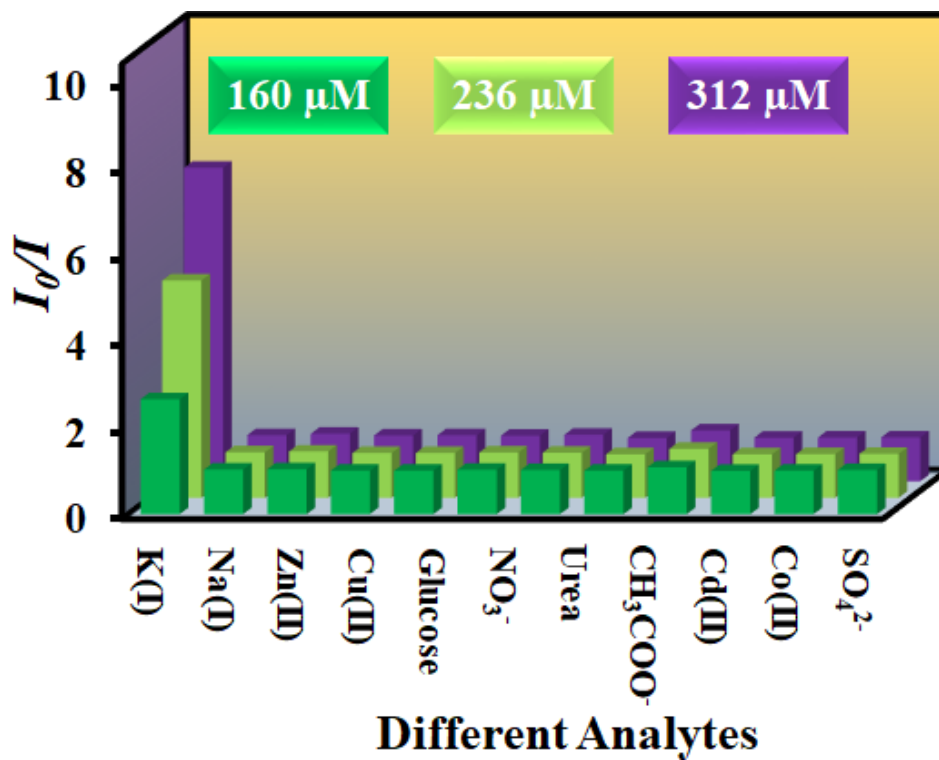

**Figure S46.** 3-D Stern-Volmer plots for nicardipine sensing.

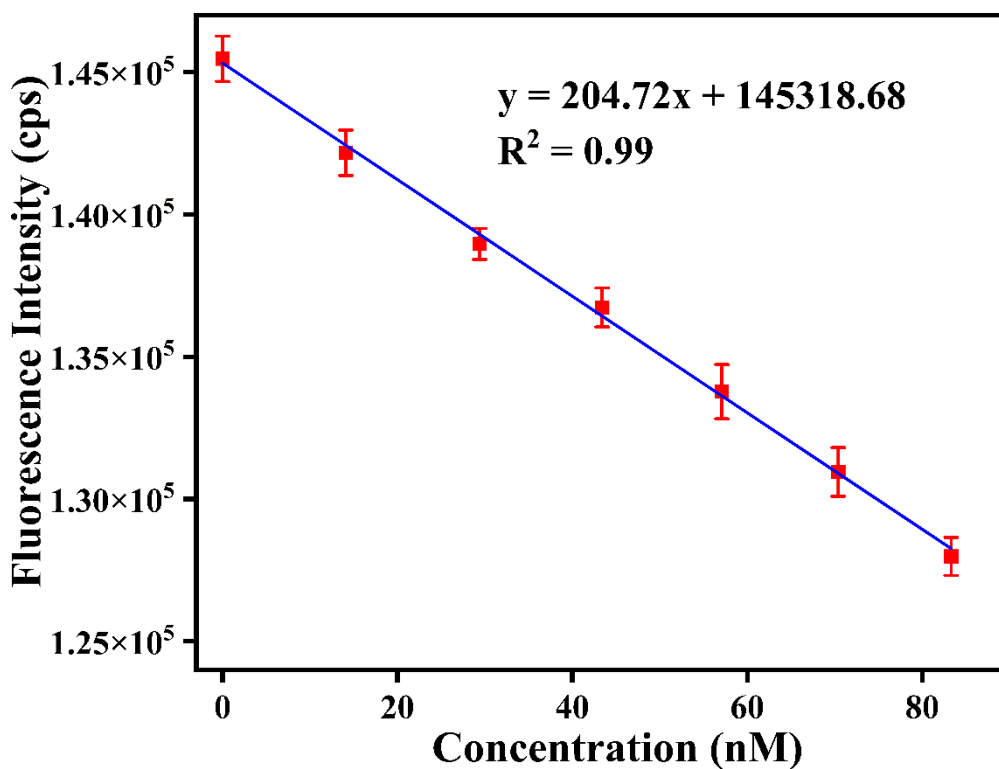

**Figure S47.** Change in the fluorescence intensity of **1'** in water as a function of concentration of nicardipine (with error bar).

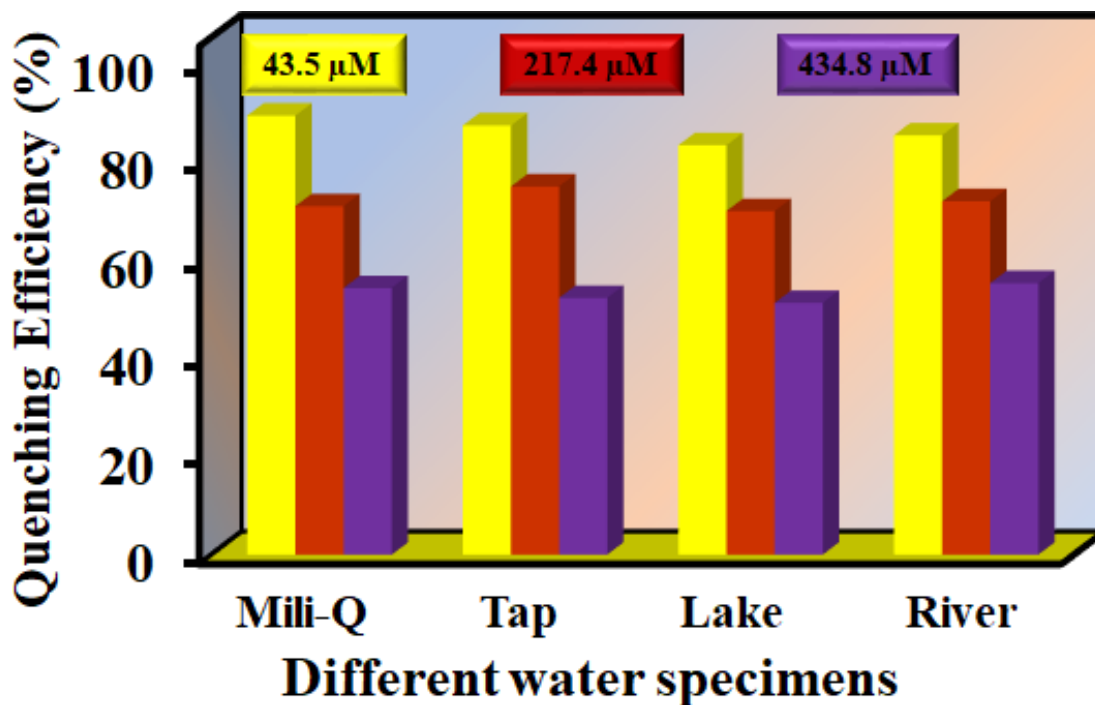

**Figure S48.** Detection of nicardipine in various wastewater specimens at different concentrations.

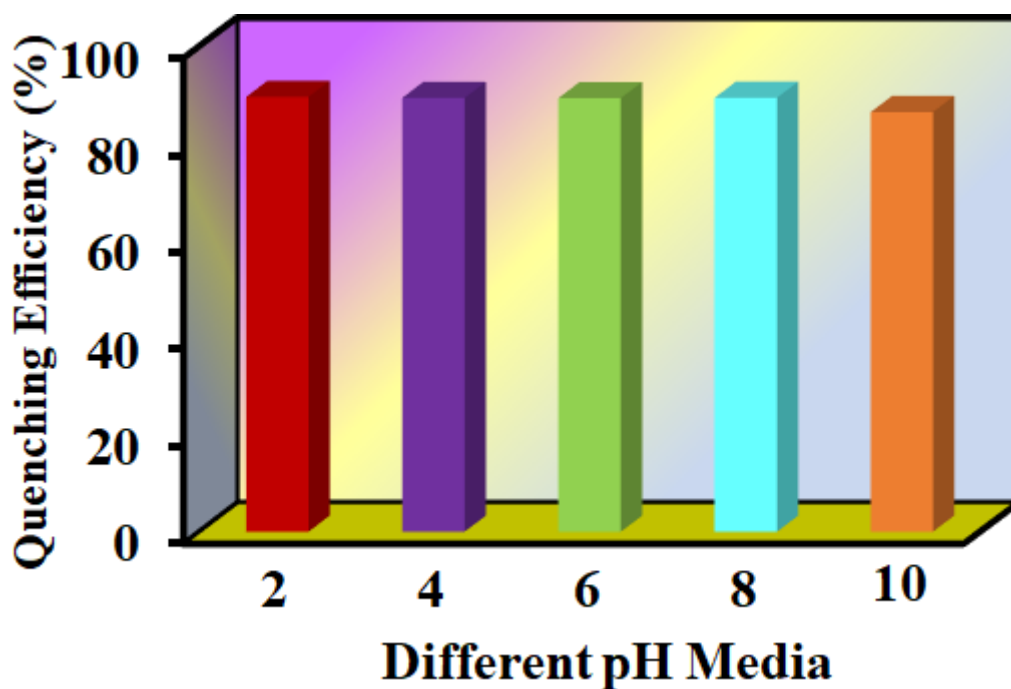

**Figure S49.** Nicardipine detection in different pH media.

**Table S1.** Fluorometric detection of nicardipine human serum sample by 1'.

| Nicardipine Spiked ( $\mu\text{M}$ ) | Nicardipine Found ( $\mu\text{M}$ ) | Recovery (%) | RSD (%) (n=3) |
|--------------------------------------|-------------------------------------|--------------|---------------|
| 9.58                                 | 10.08                               | 105.21       | 1.08          |
| 18.99                                | 18.27                               | 96.20        | 0.95          |
| 28.21                                | 28.39                               | 100.64       | 1.51          |

**Table S2.** Fluorometric detection of nicardipine human urine sample by 1'.

| Nicardipine Spiked ( $\mu\text{M}$ ) | Nicardipine Found ( $\mu\text{M}$ ) | Recovery (%) | RSD (%) (n=3) |
|--------------------------------------|-------------------------------------|--------------|---------------|
| 9.58                                 | 10.13                               | 105.74       | 1.55          |
| 18.99                                | 19.29                               | 101.58       | 0.86          |
| 28.21                                | 27.81                               | 98.58        | 1.87          |

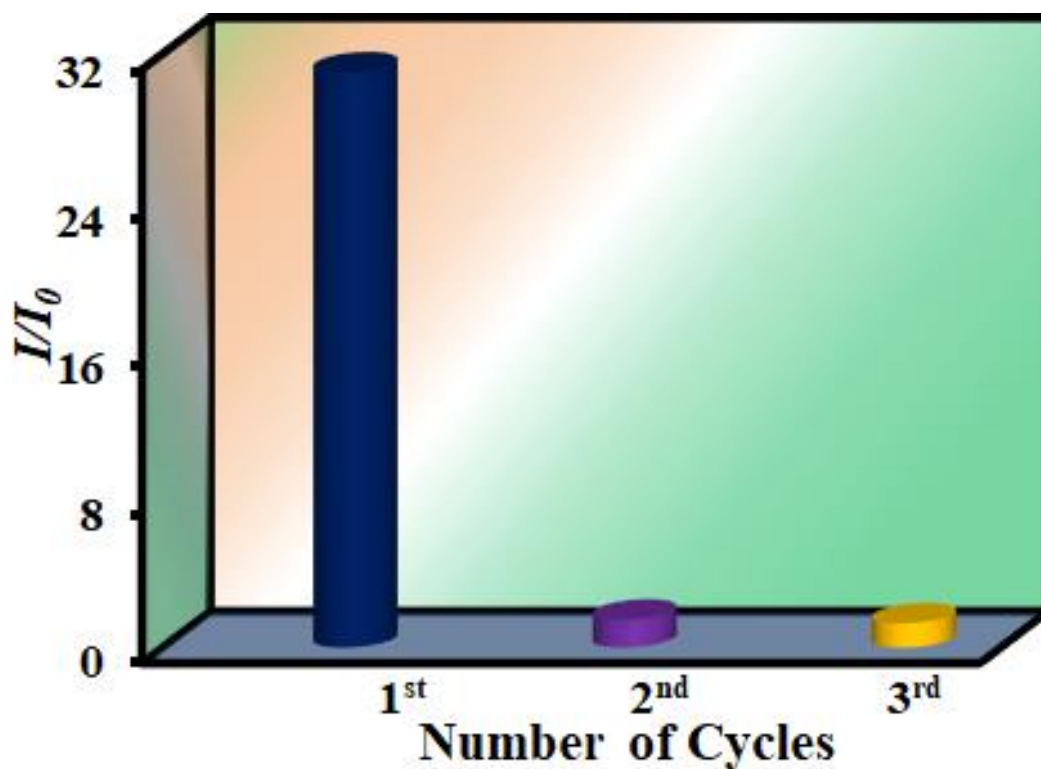

Figure S50. Reusability of the probe 1' towards  $\text{NH}_2\text{NH}_2$  sensing in aqueous medium.

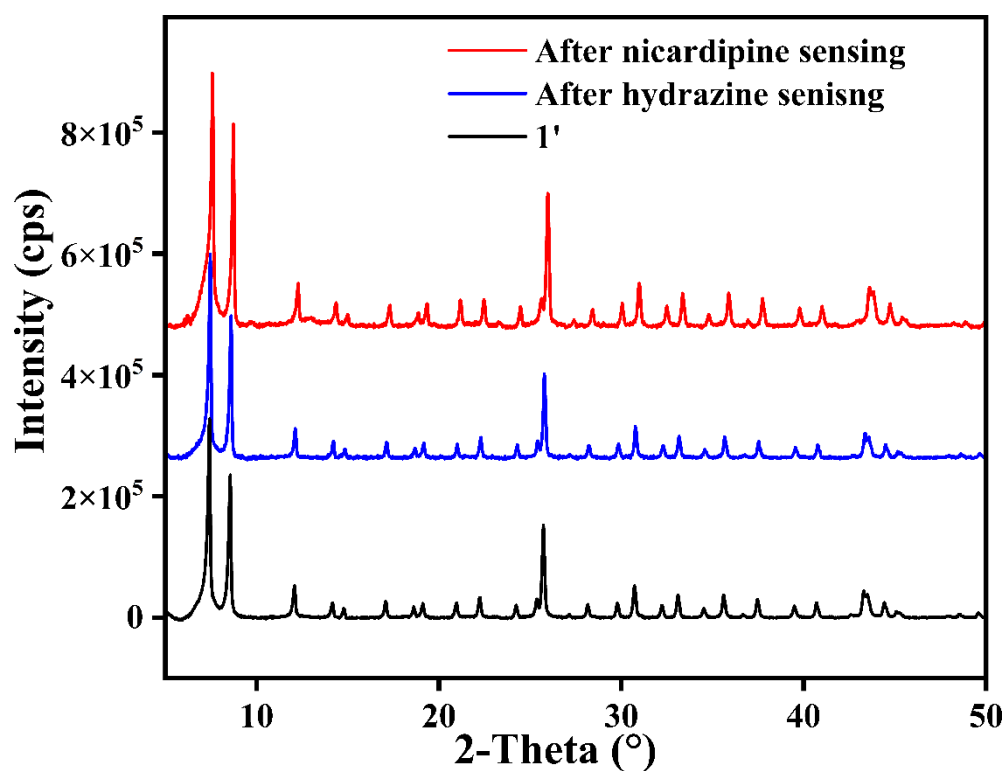

Figure S51. PXRD patterns of 1' before and after sensing of  $\text{NH}_2\text{NH}_2$  and nicardipine.

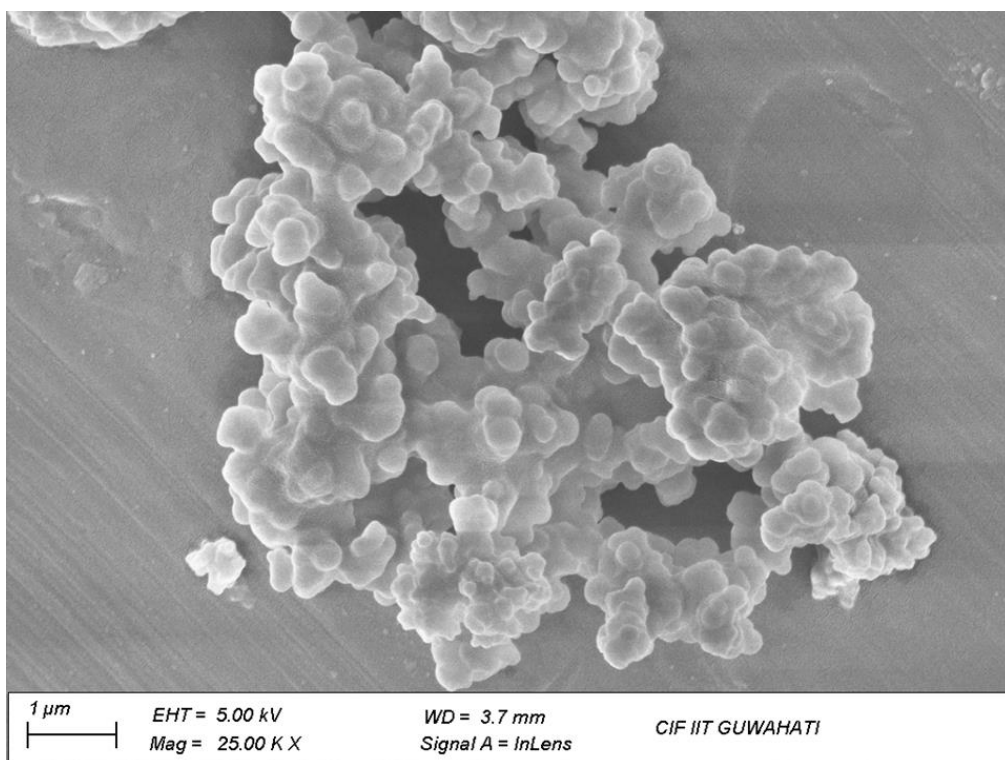

**Figure S52.** FESEM image of **1'** after hydrazine sensing.

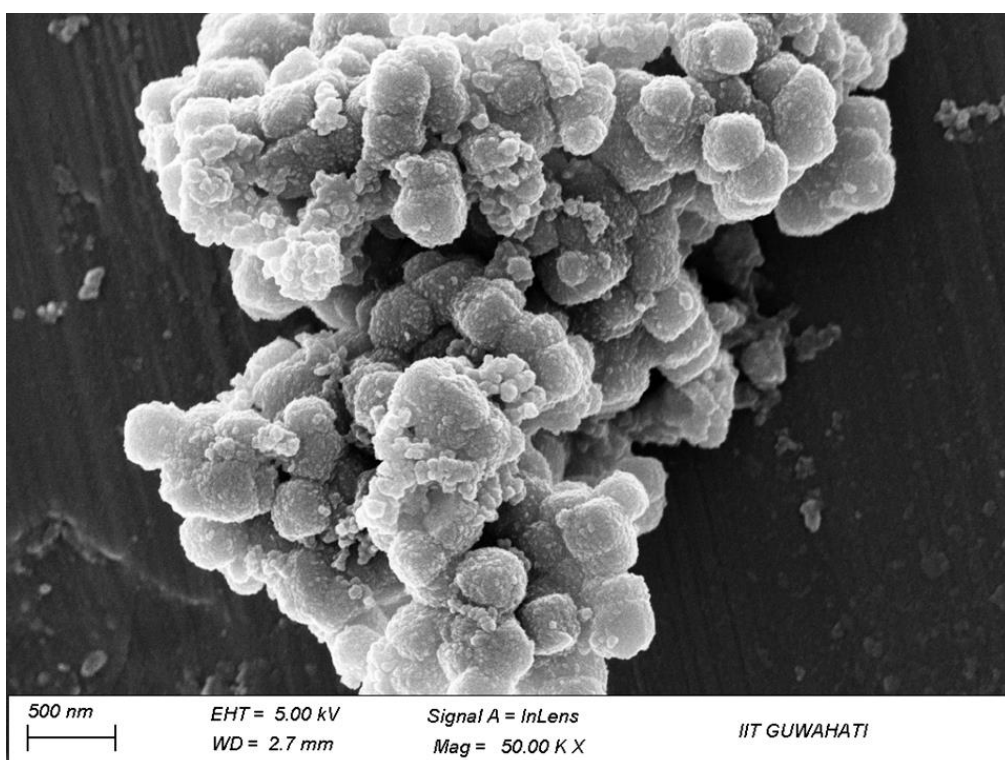

**Figure S53.** FESEM image of **1'** after nicardipine sensing.

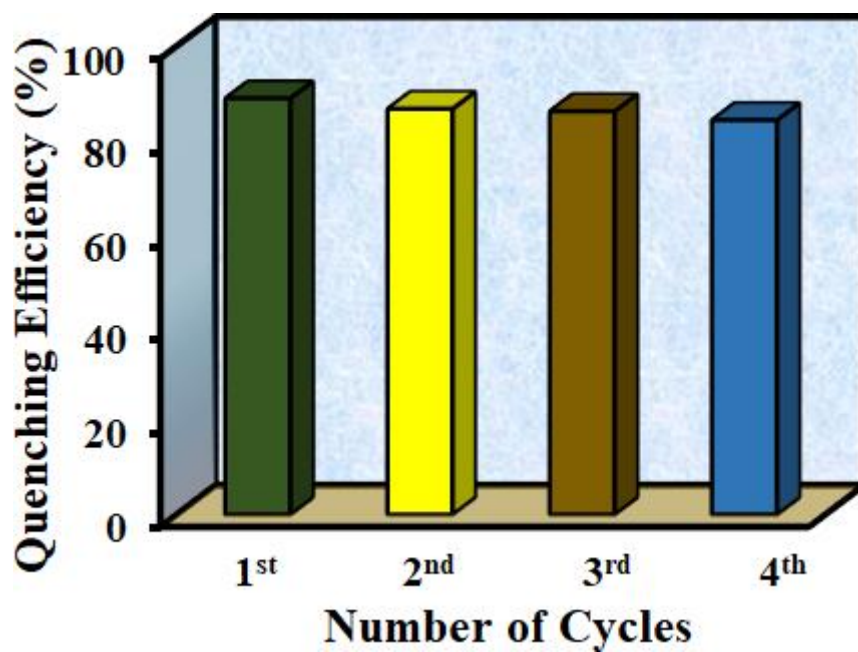

**Figure S54.** Reusability of the probe **1'** towards nicardipine sensing in aqueous medium.

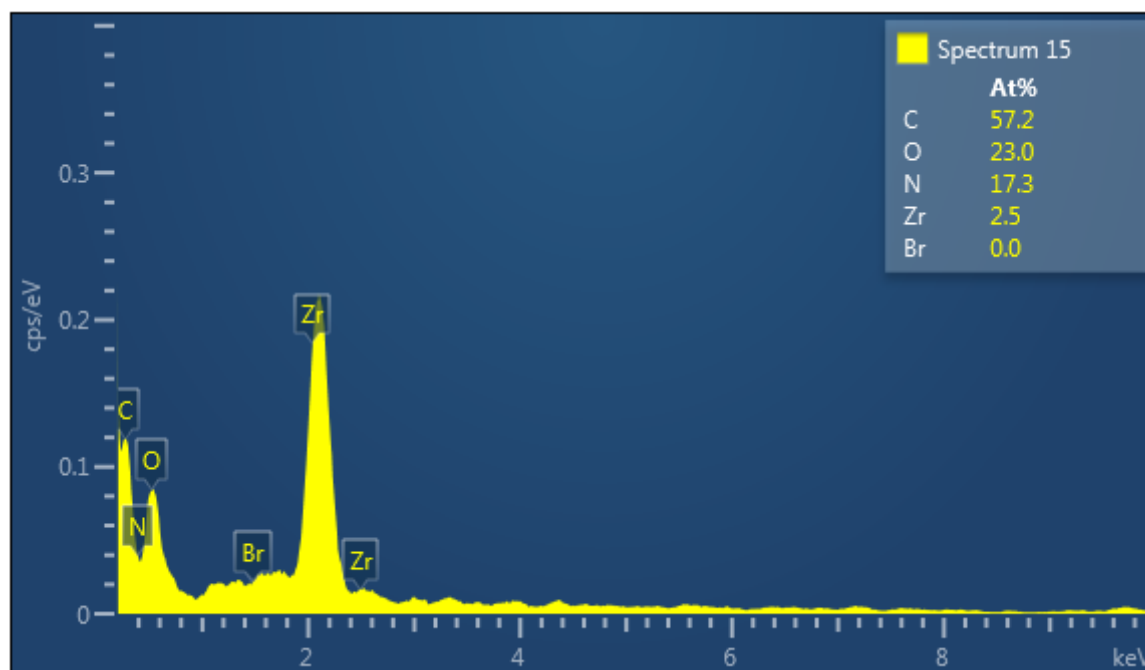

**Fig. S55.** EDX spectrum of **1'** after the treatment of  $\text{NH}_2\text{NH}_2$ .



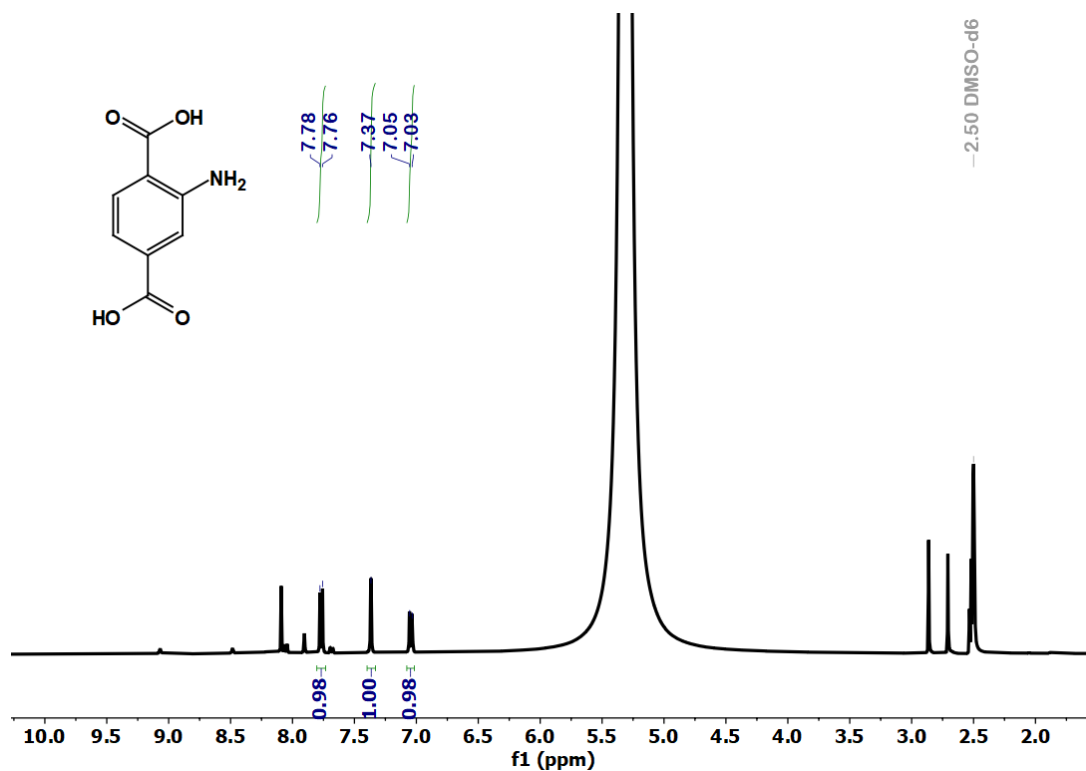

**Figure S56.** <sup>1</sup>H NMR spectrum of digested obtained **1'** after treatment of NH<sub>2</sub>NH<sub>2</sub>.

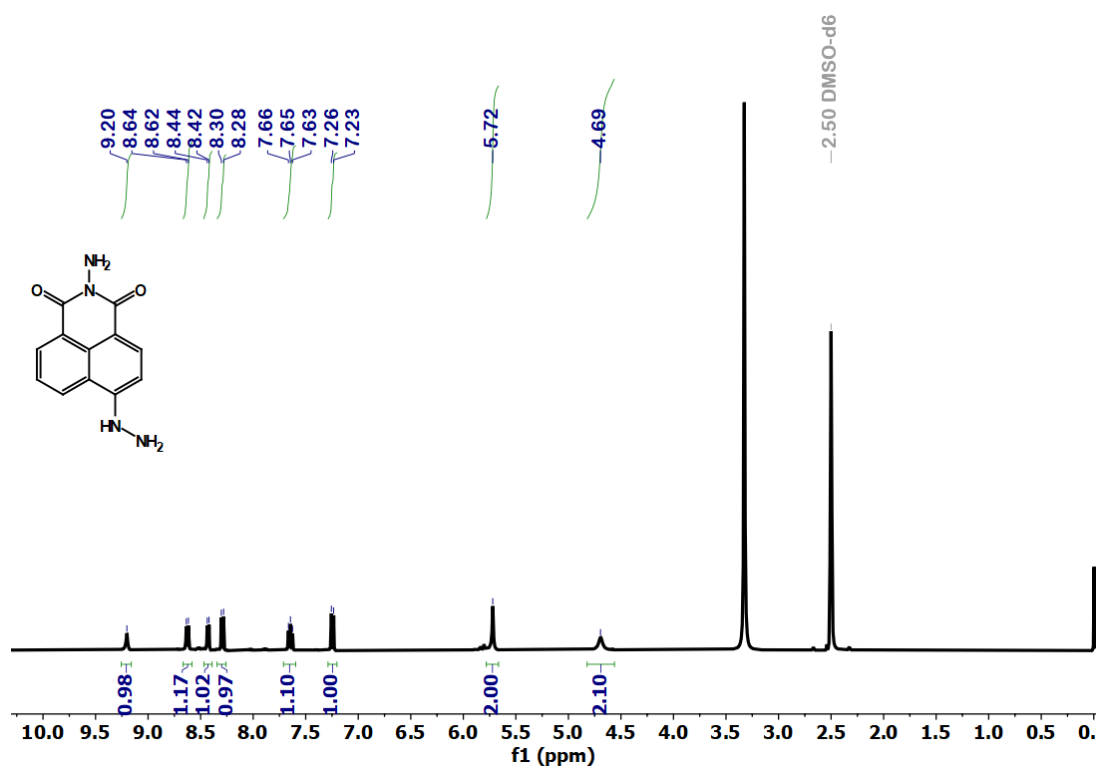

**Figure S57.** <sup>1</sup>H NMR spectrum of ligand after treatment of NH<sub>2</sub>NH<sub>2</sub>.

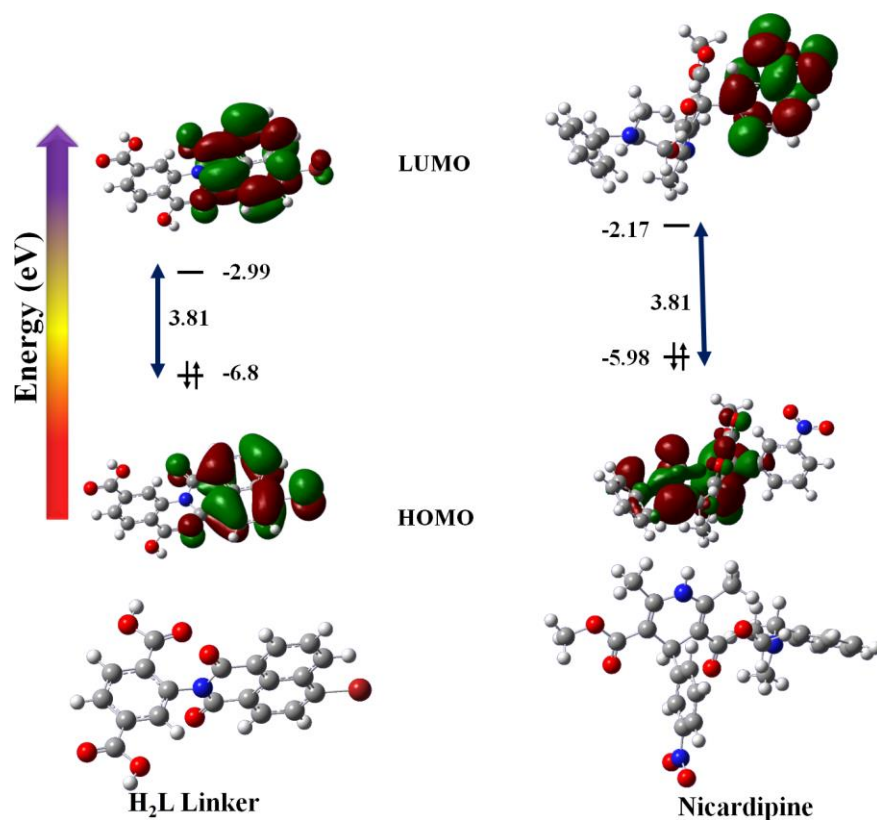

**Figure S58.** HOMO and LUMO energy levels of the free linker of MOF and nicardipine.

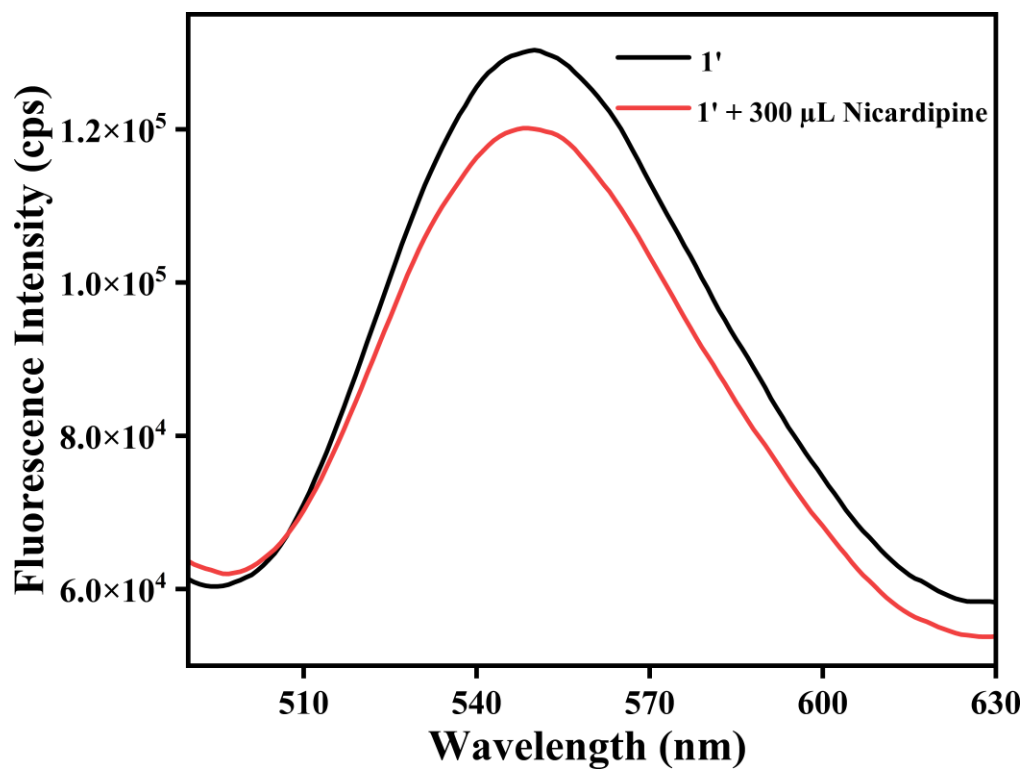

**Figure S59.** Change of fluorescence intensity of the probe **1'** in presence of nicardipine when the probe was excited at 400 nm.

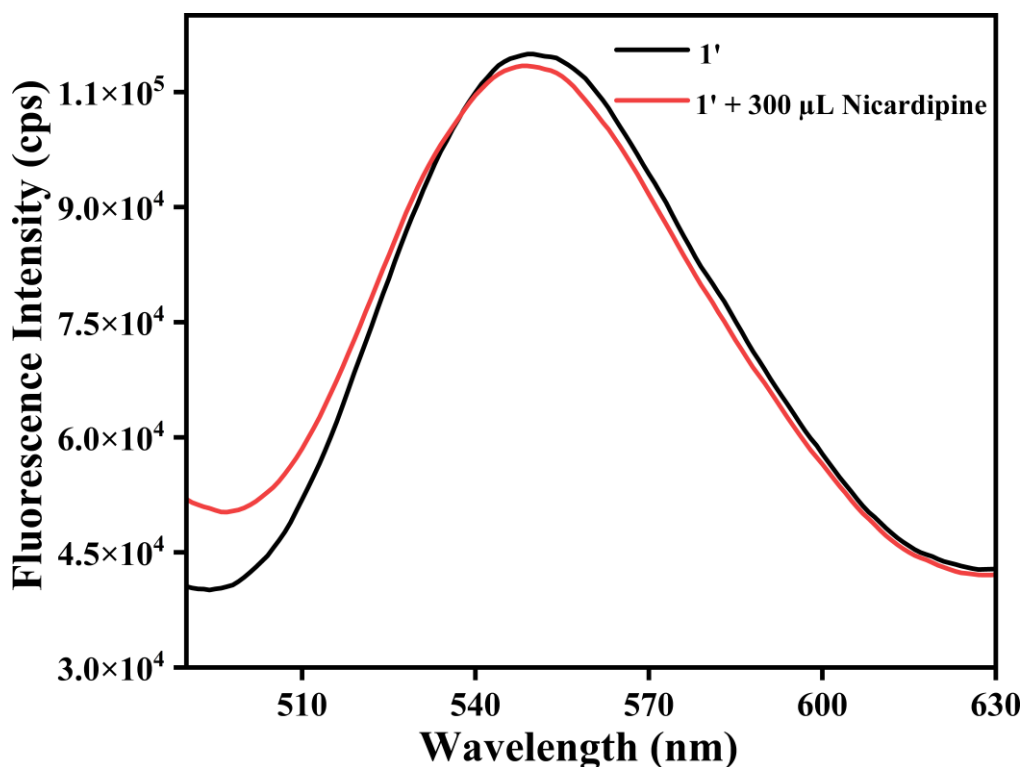

**Figure S60.** Change of fluorescence intensity of the probe **1'** in presence of nicardipine when the probe was excited at 450 nm.

**Table S3.** Comparison of the response time, detection limit and analyte used for the reported chemosensors of  $\text{NH}_2\text{NH}_2$  in the literature.

| Sl. No. | Sensor Material                                                                                                                                                | Type of Material                | Sensing Medium | Mode of Detection | Detection Limit | Response Time | Ref       |
|---------|----------------------------------------------------------------------------------------------------------------------------------------------------------------|---------------------------------|----------------|-------------------|-----------------|---------------|-----------|
| 1       | $[\text{Zr}_6\text{O}_4(\text{OH})_4(\text{C}_{20}\text{H}_8\text{BrNO}_6)_3(\text{C}_2\text{O}_2\text{F}_3)_6] \cdot 7\text{H}_2\text{O} \cdot 2.5\text{DMF}$ | MOF                             | water          | turn-on           | 1.11 nM         | 100 s         | this work |
| 2       | Zr-UiO-66-(OCOCH <sub>3</sub> ) <sub>2</sub>                                                                                                                   | MOF                             | water          | turn-on           | 78.8 nM         | -             | 2         |
| 7       | Naphsulf-O                                                                                                                                                     | organic-molecule                | PBS buffer     | turn-on           | 22 nM           | 40 min        | 3         |
| 8       | BBHC                                                                                                                                                           | organic-molecule                | PBS buffer     | turn-on           | 0.43 μM         | 1 min         | 4         |
| 9       | UiO-66-phmd                                                                                                                                                    | MOF                             | HEPES buffer   | turn-on           | 0.87 μM         | 20 min        | 5         |
| 10      | BI-E                                                                                                                                                           | near-infrared fluorescent probe | PBS buffer     | turn-on           | 0.057 μM        | 1 min         | 6         |

|    |                                  |                                      |                                                 |              |         |        |    |
|----|----------------------------------|--------------------------------------|-------------------------------------------------|--------------|---------|--------|----|
| 11 | NA-N <sub>2</sub> H <sub>4</sub> | naphthalimide based organic molecule | HEPES buffer                                    | ratio-metric | 9.4 nM  | 15 min | 7  |
| 12 | TAPHP                            | organic-molecule                     | HEPES buffer                                    | ratio-metric | 0.3 μM  | 60 min | 8  |
| 13 | HBTM                             | organic-molecule                     | PBS buffer                                      | turn-on      | 29 μM   | 55 min | 9  |
| 14 | NAC                              | naphthalene based organic molecule   | HEPES buffer                                    | turn-on      | 4.5 μM  | 4 min  | 10 |
| 17 | DPA                              | organic-molecule                     | DMSO/PBS buffer solution (4/6, v/v)             | turn-on      | 1.9 nM  | 8 min  | 11 |
| 19 | levulinated hydroxyl-coumarin 1  | organic-molecule                     | acetate buffer                                  | turn-on      | 2.46 μM | 15 min | 12 |
| 24 | PBF                              | organic-molecule                     | CH <sub>3</sub> CN-H <sub>2</sub> O (6: 4, v/v) | turn-on      | 0.41 μM | 1 min  | 13 |

### Simulated Crystallographic Information File (CIF) for Guest-Free Compound 1.

data\_Compound 1

\_audit\_creation\_date 2024-03-05

\_audit\_creation\_method 'Materials Studio'

\_symmetry\_space\_group\_name\_H-M 'R3'

\_symmetry\_Int\_Tables\_number 146

\_symmetry\_cell\_setting trigonal

loop\_

\_symmetry\_equiv\_pos\_as\_xyz

x,y,z

-y,x-y,z

-x+y,-x,z

x+2/3,y+1/3,z+1/3

-y+2/3,x-y+1/3,z+1/3

-x+y+2/3,-x+1/3,z+1/3

$x+1/3, y+2/3, z+2/3$   
 $-y+1/3, x-y+2/3, z+2/3$   
 $-x+y+1/3, -x+2/3, z+2/3$

|                   |          |
|-------------------|----------|
| _cell_length_a    | 14.6530  |
| _cell_length_b    | 14.6530  |
| _cell_length_c    | 35.9120  |
| _cell_angle_alpha | 90.0000  |
| _cell_angle_beta  | 90.0000  |
| _cell_angle_gamma | 120.0000 |

loop\_  
\_atom\_site\_label  
\_atom\_site\_type\_symbol  
\_atom\_site\_fract\_x  
\_atom\_site\_fract\_y  
\_atom\_site\_fract\_z  
\_atom\_site\_U\_iso\_or\_equiv  
\_atom\_site\_adp\_type  
\_atom\_site\_occupancy

|     |    |         |         |         |         |      |      |
|-----|----|---------|---------|---------|---------|------|------|
| Zr1 | Zr | 0.07521 | 0.14930 | 0.02338 | 0.05000 | Uiso | 1.00 |
| Zr2 | Zr | 0.58947 | 0.40622 | 0.27944 | 0.05000 | Uiso | 1.00 |
| O3  | O  | 0.17282 | 0.15718 | 0.06884 | 0.05000 | Uiso | 1.00 |
| O4  | O  | 0.04686 | 0.27292 | 0.01421 | 0.05000 | Uiso | 1.00 |
| O5  | O  | 0.49871 | 0.32206 | 0.23155 | 0.05000 | Uiso | 1.00 |
| O6  | O  | 0.50330 | 0.16717 | 0.23107 | 0.05000 | Uiso | 1.00 |
| O7  | O  | 0.17431 | 0.00197 | 0.06935 | 0.05000 | Uiso | 1.00 |
| O8  | O  | 0.15403 | 0.07740 | 0.00388 | 0.05000 | Uiso | 1.00 |
| O9  | O  | 0.07567 | 0.15476 | 0.96541 | 0.05000 | Uiso | 1.00 |
| O10 | O  | 0.22660 | 0.27461 | 0.01237 | 0.05000 | Uiso | 1.00 |
| O11 | O  | 0.43993 | 0.38418 | 0.29169 | 0.05000 | Uiso | 1.00 |
| O12 | O  | 0.60735 | 0.55291 | 0.29527 | 0.05000 | Uiso | 1.00 |

|     |   |         |         |         |         |      |      |
|-----|---|---------|---------|---------|---------|------|------|
| N13 | N | 0.20933 | 0.24949 | 0.13798 | 0.05000 | Uiso | 1.00 |
| C14 | C | 0.27689 | 0.20531 | 0.14206 | 0.05000 | Uiso | 1.00 |
| C15 | C | 0.34195 | 0.23536 | 0.17400 | 0.05000 | Uiso | 1.00 |
| C16 | C | 0.41543 | 0.12956 | 0.15475 | 0.05000 | Uiso | 1.00 |
| C17 | C | 0.35011 | 0.09798 | 0.12260 | 0.05000 | Uiso | 1.00 |
| C18 | C | 0.20413 | 0.09513 | 0.08248 | 0.05000 | Uiso | 1.00 |
| C19 | C | 0.27780 | 0.13347 | 0.11587 | 0.05000 | Uiso | 1.00 |
| C20 | C | 0.47579 | 0.23136 | 0.21677 | 0.05000 | Uiso | 1.00 |
| C21 | C | 0.41089 | 0.19798 | 0.18136 | 0.05000 | Uiso | 1.00 |
| H22 | H | 0.33597 | 0.28696 | 0.19401 | 0.06000 | Uiso | 1.00 |
| H23 | H | 0.46984 | 0.10074 | 0.15869 | 0.06000 | Uiso | 1.00 |
| H24 | H | 0.35644 | 0.04565 | 0.10285 | 0.06000 | Uiso | 1.00 |
| C25 | C | 0.62727 | 0.67691 | 0.65591 | 0.00000 | Uiso | 1.00 |
| C26 | C | 0.66370 | 0.04083 | 0.31928 | 0.00000 | Uiso | 1.00 |
| C27 | C | 0.73023 | 0.68303 | 0.65800 | 0.00000 | Uiso | 1.00 |
| C28 | C | 0.66093 | 0.93936 | 0.32115 | 0.00000 | Uiso | 1.00 |
| H29 | H | 0.45036 | 0.55559 | 0.62273 | 0.00000 | Uiso | 1.00 |
| F30 | F | 0.72976 | 0.61406 | 0.63189 | 0.00000 | Uiso | 1.00 |
| F31 | F | 0.74528 | 0.65376 | 0.69309 | 0.00000 | Uiso | 1.00 |
| F32 | F | 0.80944 | 0.78497 | 0.65065 | 0.00000 | Uiso | 1.00 |
| F33 | F | 0.86264 | 0.57054 | 0.65929 | 0.00000 | Uiso | 1.00 |
| F34 | F | 0.93117 | 0.71464 | 0.62198 | 0.00000 | Uiso | 1.00 |
| F35 | F | 0.95059 | 0.73404 | 0.68449 | 0.00000 | Uiso | 1.00 |
| C36 | C | 0.56677 | 0.99481 | 0.77875 | 0.00000 | Uiso | 1.00 |
| C37 | C | 0.51702 | 0.06055 | 0.78148 | 0.00000 | Uiso | 1.00 |
| C38 | C | 0.47484 | 0.06458 | 0.81601 | 0.00000 | Uiso | 1.00 |
| C39 | C | 0.45211 | 0.98592 | 0.84256 | 0.00000 | Uiso | 1.00 |
| C40 | C | 0.47447 | 0.90128 | 0.83341 | 0.00000 | Uiso | 1.00 |
| O41 | O | 0.77331 | 0.48950 | 0.51971 | 0.00000 | Uiso | 1.00 |
| O42 | O | 0.96868 | 0.68292 | 0.42210 | 0.00000 | Uiso | 1.00 |

|      |    |         |          |         |         |      |      |
|------|----|---------|----------|---------|---------|------|------|
| C43  | C  | 0.18322 | 0.97672  | 0.49128 | 0.00000 | Uiso | 1.00 |
| C44  | C  | 0.11320 | 0.91762  | 0.46287 | 0.00000 | Uiso | 1.00 |
| C45  | C  | 0.12575 | 0.95880  | 0.42690 | 0.00000 | Uiso | 1.00 |
| C46  | C  | 0.20359 | 0.06249  | 0.41970 | 0.00000 | Uiso | 1.00 |
| C47  | C  | 0.33732 | 0.09207  | 0.54502 | 0.00000 | Uiso | 1.00 |
| C48  | C  | 0.24626 | -0.00066 | 0.55478 | 0.00000 | Uiso | 1.00 |
| C49  | C  | 0.16944 | 0.94084  | 0.52830 | 0.00000 | Uiso | 1.00 |
| Br50 | Br | 0.51232 | 0.88866  | 0.21216 | 0.00000 | Uiso | 1.00 |
| H51  | H  | 0.78867 | 0.94929  | 0.46849 | 0.00000 | Uiso | 1.00 |
| H52  | H  | 0.83862 | 0.92682  | 0.40481 | 0.00000 | Uiso | 1.00 |
| H53  | H  | 0.88775 | 0.79178  | 0.39241 | 0.00000 | Uiso | 1.00 |
| H54  | H  | 0.74012 | 0.60389  | 0.56587 | 0.00000 | Uiso | 1.00 |
| H55  | H  | 0.74166 | 0.76697  | 0.58327 | 0.00000 | Uiso | 1.00 |
| O56  | O  | 0.00000 | 0.00000  | 0.04492 | 0.05000 | Uiso | 1.00 |
| O57  | O  | 0.66667 | 0.33333  | 0.25843 | 0.05000 | Uiso | 1.00 |
| H58  | H  | 0.66667 | 0.33333  | 0.40582 | 0.00000 | Uiso | 1.00 |

loop\_

\_geom\_bond\_atom\_site\_label\_1

\_geom\_bond\_atom\_site\_label\_2

\_geom\_bond\_distance

\_geom\_bond\_site\_symmetry\_2

\_ccdc\_geom\_bond\_type

Zr1 O3 2.135 . S

Zr1 O4 2.077 . S

Zr1 O8 2.038 . S

Zr1 O9 2.083 1\_554 S

Zr1 O10 2.092 . S

Zr1 O56 2.047 . S

Zr1 O7 2.121 2 S

Zr1 O8 2.060 2 S

|     |     |       |       |   |
|-----|-----|-------|-------|---|
| Zr2 | O5  | 2.147 | .     | S |
| Zr2 | O11 | 2.095 | .     | S |
| Zr2 | O12 | 2.109 | .     | S |
| Zr2 | O57 | 2.049 | .     | S |
| Zr2 | O6  | 2.126 | 3_665 | S |
| Zr2 | O9  | 2.061 | 4_554 | S |
| Zr2 | O8  | 2.075 | 5     | S |
| Zr2 | O9  | 2.050 | 5_554 | S |
| O3  | C18 | 1.301 | .     | A |
| O4  | C25 | 1.289 | 5_554 | A |
| O5  | C20 | 1.309 | .     | A |
| O6  | C20 | 1.300 | .     | A |
| O6  | Zr2 | 2.126 | 2_655 | S |
| O7  | C18 | 1.296 | .     | A |
| O7  | Zr1 | 2.121 | 3     | S |
| O8  | Zr1 | 2.060 | 3     | S |
| O8  | Zr2 | 2.075 | 9_554 | S |
| O9  | Zr1 | 2.083 | 1_556 | S |
| O9  | Zr2 | 2.061 | 7_445 | S |
| O9  | Zr2 | 2.050 | 9     | S |
| O9  | H29 | 0.989 | 5     | S |
| O10 | C26 | 1.292 | 8_544 | A |
| O11 | C26 | 1.294 | 3_665 | A |
| O12 | C25 | 1.298 | 8_654 | A |
| N13 | C14 | 1.436 | .     | S |
| N13 | C36 | 1.382 | 4_444 | S |
| N13 | C40 | 1.377 | 4_444 | S |
| C14 | C15 | 1.414 | .     | A |
| C14 | C19 | 1.417 | .     | A |
| C15 | C21 | 1.394 | .     | A |



|     |     |       |       |   |
|-----|-----|-------|-------|---|
| C15 | H22 | 1.078 | .     | S |
| C16 | C17 | 1.421 | .     | A |
| C16 | C21 | 1.410 | .     | A |
| C16 | H23 | 1.082 | .     | S |
| C17 | C19 | 1.415 | .     | A |
| C17 | H24 | 1.082 | .     | S |
| C18 | C19 | 1.521 | .     | S |
| C20 | C21 | 1.515 | .     | S |
| C25 | O4  | 1.289 | 9     | A |
| C25 | O12 | 1.298 | 6_565 | A |
| C25 | C27 | 1.468 | .     | S |
| C26 | O11 | 1.294 | 2_655 | A |
| C26 | O10 | 1.292 | 6     | A |
| C26 | C28 | 1.469 | 1_545 | S |
| C27 | F30 | 1.376 | .     | S |
| C27 | F31 | 1.384 | .     | S |
| C27 | F32 | 1.384 | .     | S |
| C28 | C26 | 1.469 | 1_565 | S |
| C28 | F33 | 1.384 | 8_654 | S |
| C28 | F34 | 1.383 | 8_654 | S |
| C28 | F35 | 1.382 | 8_654 | S |
| H29 | O9  | 0.989 | 9_554 | S |
| F33 | C28 | 1.384 | 6_565 | S |
| F34 | C28 | 1.383 | 6_565 | S |
| F35 | C28 | 1.382 | 6_565 | S |
| C36 | C37 | 1.474 | 1_565 | S |
| C36 | N13 | 1.382 | 7     | S |
| C36 | O42 | 1.222 | 4_455 | D |
| C37 | C36 | 1.474 | 1_545 | S |
| C37 | C38 | 1.400 | .     | A |

|      |      |       |       |   |
|------|------|-------|-------|---|
| C37  | C46  | 1.400 | 6     | A |
| C38  | C39  | 1.402 | 1_545 | A |
| C38  | C43  | 1.408 | 6_455 | A |
| C39  | C38  | 1.402 | 1_565 | A |
| C39  | C40  | 1.470 | .     | S |
| C39  | C47  | 1.394 | 6_565 | A |
| C40  | N13  | 1.377 | 7     | S |
| C40  | O41  | 1.222 | 4_455 | D |
| O41  | C40  | 1.222 | 7_544 | D |
| O42  | C36  | 1.222 | 7_544 | D |
| C43  | C44  | 1.398 | .     | A |
| C43  | C38  | 1.408 | 8_554 | A |
| C43  | C49  | 1.407 | .     | A |
| C44  | C45  | 1.398 | .     | A |
| C44  | H51  | 1.069 | 2_665 | S |
| C45  | C46  | 1.394 | 1_565 | A |
| C45  | H52  | 1.080 | 2_665 | S |
| C46  | C45  | 1.394 | 1_545 | A |
| C46  | C37  | 1.400 | 8_544 | A |
| C46  | H53  | 1.083 | 2_655 | S |
| C47  | C48  | 1.392 | .     | A |
| C47  | C39  | 1.394 | 8_654 | A |
| C47  | H54  | 1.079 | 2_655 | S |
| C48  | C49  | 1.393 | 1_545 | A |
| C48  | H55  | 1.070 | 2_655 | S |
| C49  | C48  | 1.393 | 1_565 | A |
| C49  | Br50 | 1.909 | 6_465 | S |
| Br50 | C49  | 1.909 | 8_664 | S |
| H51  | C44  | 1.069 | 3_565 | S |
| H52  | C45  | 1.080 | 3_565 | S |

H53 C46 1.083 3\_665 S  
H54 C47 1.079 3\_665 S  
H55 C48 1.070 3\_665 S  
O56 Zr1 2.047 2 S  
O56 Zr1 2.047 3 S  
O56 H58 0.990 7\_444 S  
O57 Zr2 2.049 2\_655 S  
O57 Zr2 2.049 3\_665 S  
H58 O56 0.990 4 S

### References:

- (1) Farha, O. K.; Özgür Yazaydın, A.; Eryazici, I.; Malliakas, C. D.; Hauser, B. G.; Kanatzidis, M. G.; Nguyen, S. T.; Snurr, R. Q.; Hupp, J. T. De novo synthesis of a metal–organic framework material featuring ultrahigh surface area and gas storage capacities. *Nat. Chem.* **2010**, 2 (11), 944-948.
- (2) Nandi, S.; Mostakim, S.; Biswas, S. Rapid switch-on fluorescent detection of nanomolar-level hydrazine in water by a diacetoxo-functionalized MOF: application in paper strips and environmental samples. *Dalton Trans.* **2020**, 49 (36), 12565-12573.
- (3) Mahapatra, A. K.; Maji, R.; Maiti, K.; Manna, S. K.; Mondal, S.; Ali, S. S.; Manna, S.; Sahoo, P.; Mandal, S.; Uddin, M. R. A BODIPY/pyrene-based chemodosimetric fluorescent chemosensor for selective sensing of hydrazine in the gas and aqueous solution state and its imaging in living cells. *RSC Adv.* **2015**, 5 (72), 58228-58236.
- (4) Chen, W.; Liu, W.; Liu, X.-J.; Kuang, Y.-Q.; Yu, R.-Q.; Jiang, J.-H. A novel fluorescent probe for sensitive detection and imaging of hydrazine in living cells. *Talanta* **2017**, 162, 225-231.
- (5) Mostakim, S.; Khan, M. R. U. Z.; Das, A.; Nandi, S.; Trivedi, V.; Biswas, S. A phthalimide-functionalized UiO-66 metal–organic framework for the fluorogenic detection of hydrazine in live cells. *Dalton Trans.* **2019**, 48 (33), 12615-12621.
- (6) Zhang, Z.; Zhuang, Z.; Song, L.; Zhang, S.; Zheng, G.; Zhan, F. A FRET-based ratiometric fluorescent probe for hydrazine and its application in living cells. *J. Photochem. Photobiol.* **2018**, 358, 10-16.
- (7) Ma, J.; Fan, J.; Li, H.; Yao, Q.; Xia, J.; Wang, J.; Peng, X. Probing hydrazine with a near-infrared fluorescent chemodosimeter. *Dyes Pigments* **2017**, 138, 39-46.
- (8) Xia, X.; Zeng, F.; Zhang, P.; Lyu, J.; Huang, Y.; Wu, S. An ICT-based ratiometric fluorescent probe for hydrazine detection and its application in living cells and in vivo. *Sens. Actuators B: Chem.* **2016**, 227, 411-418.
- (9) Luo, Z.; Liu, B.; Qin, T.; Zhu, K.; Zhao, C.; Pan, C.; Wang, L. Cyclization of chalcone enables ratiometric fluorescence determination of hydrazine with a high selectivity. *Sens. Actuators B: Chem.* **2018**, 263, 229-236.
- (10) Zhou, D.; Wang, Y.; Jia, J.; Yu, W.; Qu, B.; Li, X.; Sun, X. H-Bonding and charging mediated aggregation and emission for fluorescence turn-on detection of hydrazine hydrate. *Chem. Commun.* **2015**, 51 (53), 10656-10659.

- (11) Goswami, S.; Das, A. K.; Saha, U.; Maity, S.; Khanra, K.; Bhattacharyya, N. Rapid detection of hydrazine in a naphthol-fused chromenyl loop and its effectiveness in human lung cancer cells: tuning remarkable selectivity via the reaction altered pathway supported by theoretical studies. *Org. Biomol. Chem.* **2015**, *13* (7), 2134-2139.
- (12) Roy, B.; Halder, S.; Guha, A.; Bandyopadhyay, S. Highly selective sub-ppm naked-eye detection of hydrazine with conjugated-1, 3-diketo probes: imaging hydrazine in drosophila larvae. *Anal. Chem.* **2017**, *89* (19), 10625-10636.
- (13) Goswami, S.; Paul, S.; Manna, A. Fast and ratiometric “naked eye” detection of hydrazine for both solid and vapour phase sensing. *New J. Chem.* **2015**, *39* (3), 2300-2305.
